# Supplementary material for: CD137 (4-1BB) Costimulation Modifies DNA Methylation in CD8+ T Cell–Relevant Genes
Source: Oxford University Press journal article supplement (doi:10.1158/2326-6066.cir-17-0159), 2017-11-13
Supplement: 23266066cir170159-sup-181295_2_supp_4359476_4yj3d0.docx [file 23266066cir170159-sup-181295_2_supp_4359476_4yj3d0.docx]

**Supplementary Table S1: Urelumab-related differentially methylated CpGs.**

| TargetIDa | UCSC_REFGENE_NAMEb | | delta (URE-control)c | CHRd | | MAPINFOe | UCSC_REFGENE_GROUPf | | RELATION TO UCSC CPG ISLANDg | |
| --- | --- | --- | --- | --- | --- | --- | --- | --- | --- | --- |
| cg08591265 | | SFRS1;SFRS1 | -0,44 | 17 | | 56082867 | 3'UTR;Body | | N_Shore | |
| cg17515347 | | AIM2 | -0,40 | 1 | | 159047163 | TSS1500 | |  | |
| cg26876834 | | SNHG9;SNORA64;SNORA10;RPS2 | -0,39 | 16 | | 2013573 | TSS1500;TSS1500;TSS1500;Body | | N_Shore | |
| cg13279700 | | C6orf10 | -0,39 | 6 | | 32313583 | Body | |  | |
| cg14032089 | | TMEM49;MIR21 | -0,39 | | 17 | 57917589 | | 3'UTR;TSS1500 | |  | |
| cg15036529 | | PYHIN1 | -0,39 | | 1 | 158900644 | | TSS1500; | |  | |
| cg00803692 | | CCR5;CCR5 | -0,38 | 3 | | 46411474 | TSS200;TSS200 | |  | |
| cg22374742 | | UXS1 | -0,38 | 2 | | 106761673 | Body | |  | |
| cg04276626 | | MIR21 | -0,38 | 17 | | 57918500 | TSS200 | |  | |
| cg01464186 | | SGMS1 | -0,38 | 10 | | 52191661 | 5'UTR | |  | |
| cg15729230 | | FASLG | -0,38 | 1 | | 172628514 | 1stExon | |  | |
| cg04441847 | | SFRS7 | -0,38 | 2 | | 38976288 | Body | | N_Shore | |
| cg19747271 | | SCAND3 | -0,38 | 6 | | 28553390 | Body | | N_Shore | |
| cg11872231 | | GTDC1;GTDC1;GTDC1 | -0,37 | 2 | | 144992352 | 5'UTR;5'UTR;5'UTR | |  | |
| cg18598146 | | SNORD12B;C20orf199;MIR1259;C20orf199;SNORD12;C20orf199 | -0,37 | 20 | | 47896448 | TSS1500;Body;TSS1500;Body;TSS1500;Body | | S_Shore | |
| cg04474366 | | SNORA4;EIF4A2 | -0,37 | 3 | | 186505347 | TSS200;Body | | S_Shelf | |
| cg10488050 | | CHCHD3 | -0,37 | 7 | | 132617821 | Body | |  | |
| cg25249713 | | WDR17;WDR17 | -0,37 | 4 | | 177045356 | Body;Body | |  | |
| cg20311002 | | C1orf101;C1orf101 | -0,37 | 1 | | 244763541 | Body;Body | |  | |
| cg06022561 | | D2HGDH | -0,37 | 2 | | 242702553 | Body | |  | |
| cg06471491 | | MIR21 | -0,37 | 17 | | 57917974 | TSS1500 | |  | |
| cg14791639 | | ATXN1;ATXN1 | -0,37 | 6 | | 16699028 | 5'UTR;5'UTR | |  | |
| cg21113592 | | HEATR5A | -0,36 | 14 | | 31858067 | 1stExon | |  | |
| cg02782634 | | TMEM49 | -0,36 | 17 | | 57916643 | Body | |  | |
| cg03578193 | | C2orf86 | -0,36 | 2 | | 63671845 | Body | |  | |
| cg20333869 | | RHEB | -0,36 | 7 | | 151169370 | Body | |  | |
| cg11669284 | | WDR70 | -0,36 | 5 | | 37721782 | Body | |  | |
| cg11417323 | | NFYC;NFYC;NFYC;NFYC;NFYC | -0,36 | 1 | | 41160271 | 5'UTR;5'UTR;5'UTR;5'UTR;5'UTR | | S_Shelf | |
| cg00640314 | | SNORD87;SNHG6 | -0,36 | 8 | | 67835853 | TSS1500;Body | | N_Shore | |
| cg17217296 | | AIM2 | -0,36 | 1 | | 159046937 | TSS1500 | |  | |
| cg08343600 | | HNRNPF;HNRNPF;HNRNPF;HNRNPF;HNRNPF | -0,36 | 10 | | 43894095 | 5'UTR;TSS1500;5'UTR;5'UTR;5'UTR | | S_Shore | |
| cg10838380 | | WDR37 | -0,36 | 10 | | 1156113 | Body | |  | |
| cg01394116 | | RBM22 | -0,36 | 5 | | 150081499 | TSS1500 | | S_Shore | |
| cg09931909 | | C6orf150 | -0,36 | 6 | | 74160206 | Body | | N_Shore | |
| cg01503299 | | NOP14 | -0,35 | 4 | | 2963264 | Body | | N_Shore | |
| cg14564638 | | GAS5;SNORD78;SNORD44;SNORD80;SNORD79 | -0,35 | 1 | | 173835211 | Body;TSS1500;TSS200;TSS1500;TSS1500 | | N_Shore | |
| cg19149314 | | HECW2 | -0,35 | 2 | | 197065128 | 3'UTR | |  | |
| cg17786516 | | CCR5;CCR5 | -0,35 | 3 | | 46410422 | TSS1500;TSS1500 | |  | |
| cg24376214 | | RASGRP4;RASGRP4;RASGRP4;RASGRP4;RASGRP4;RASGRP4;RASGRP4 | -0,35 | 19 | | 38918135 | TSS1500;TSS1500;TSS1500;TSS1500;TSS1500;TSS1500;TSS1500 | |  | |
| cg01188753 | | C20orf199;C20orf199;SNORD12;C20orf199 | -0,35 | 20 | | 47897068 | Body;Body;TSS200;Body | | S_Shore | |
| cg15857470 | | SRPK2 | -0,35 | 7 | | 104945248 | Body | | S_Shelf | |
| cg25296103 | | ZEB2;ZEB2 | -0,35 | 2 | | 145268533 | Body;Body | |  | |
| cg16101077 | | CLRN3 | -0,35 | 10 | | 129676142 | 3'UTR | |  | |
| cg10829004 | | RTN1;RTN1 | -0,35 | 14 | | 60179825 | Body;Body | |  | |
| cg16524818 | | NID1 | -0,35 | 1 | | 236162295 | Body | |  | |
| cg22082462 | | CPNE6 | -0,35 | 14 | | 24540415 | TSS1500 | |  | |
| cg05582310 | | EVC | -0,35 | 4 | | 5760808 | Body | |  | |
| cg20591695 | | FLJ32065 | -0,35 | 17 | | 62965512 | Body | | S_Shelf | |
| cg06333725 | | SGMS1 | -0,35 | 10 | | 52156632 | 5'UTR | |  | |
| cg18282393 | | ACOXL;ACOXL;ACOXL | -0,35 | 2 | | 111788355 | Body;Body;Body | |  | |
| cg11213983 | | CCDC46;CCDC46 | -0,35 | 17 | | 63652954 | Body;Body | |  | |
| cg16061656 | | CADM1;CADM1 | -0,35 | 11 | | 115088907 | Body;Body | |  | |
| cg14465207 | | PDIA6 | -0,35 | 2 | | 10951250 | Body | | N_Shore | |
| cg09800500 | | BCAT1 | -0,35 | 12 | | 24992256 | Body | |  | |
| cg20547015 | | PPP1CC | -0,35 | 12 | | 111165713 | Body | |  | |
| cg08142096 | | C11orf53 | -0,35 | 11 | | 111125837 | TSS1500 | |  | |
| cg11876705 | | RASGRP4;RASGRP4;RASGRP4;RASGRP4;RASGRP4;RASGRP4;RASGRP4 | -0,35 | 19 | | 38918253 | TSS1500;TSS1500;TSS1500;TSS1500;TSS1500;TSS1500;TSS1500 | |  | |
| cg07891862 | | PTK2;PTK2 | -0,34 | 8 | | 141774605 | Body;Body | |  | |
| cg24143221 | | HSPA1L | -0,34 | 6 | | 31780526 | 5'UTR | | N_Shelf | |
| cg02841912 | | SYNE1;SYNE1 | -0,34 | 6 | | 152955983 | 5'UTR;5'UTR | | N_Shore | |
| cg01417394 | | INPP4B;INPP4B | -0,34 | 4 | | 143324090 | Body;Body | |  | |
| cg14662886 | | SNORA6;RPSA;RPSA | -0,34 | 3 | | 39450018 | Body;Body;Body | | S_Shore | |
| cg23218957 | | DACT1;DACT1 | -0,34 | 14 | | 59109856 | Body;Body | | N_Shelf | |
| cg06626750 | | SFRS1;SFRS1 | -0,34 | 17 | | 56082885 | 3'UTR;Body | | N_Shore | |
| cg07181702 | | MIR21 | -0,34 | 17 | | 57918682 | Body | |  | |
| cg05600421 | | MPPED2;MPPED2 | -0,34 | 11 | | 30597981 | Body;Body | |  | |
| cg01789743 | | NID1 | -0,34 | 1 | | 236159467 | Body | | S_Shelf | |
| cg06754496 | | SGMS1 | -0,34 | 10 | | 52268375 | 5'UTR | |  | |
| cg00088079 | | ATXN1;ATXN1 | -0,34 | 6 | | 16622634 | 5'UTR;5'UTR | |  | |
| cg03812676 | | AIP | -0,34 | 11 | | 67254381 | Body | | S_Shelf | |
| cg05224770 | | IFNG | -0,34 | 12 | | 68553819 | TSS1500 | |  | |
| cg00182421 | | RPL22L1 | -0,34 | 3 | | 170586396 | Body | | N_Shore | |
| cg17430370 | | MYO3B;MYO3B;MYO3B;MYO3B;MYO3B;MYO3B | -0,34 | 2 | | 171034661 | 5'UTR;5'UTR;1stExon;5'UTR;1stExon;1stExon | |  | |
| cg07307830 | | FSIP1 | -0,34 | 15 | | 39917402 | Body | |  | |
| cg00789792 | | MIR548N;OSBPL6;OSBPL6 | -0,34 | 2 | | 179245704 | TSS1500;Body;Body | |  | |
| cg04279139 | | LOC100133893 | -0,34 | 12 | | 27925367 | TSS1500 | |  | |
| cg06019050 | | LIN54;LIN54;LIN54 | -0,34 | 4 | | 83928766 | 5'UTR;5'UTR;5'UTR | | N_Shelf | |
| cg15601452 | | SNHG12;SNORD99;SNORA61 | -0,34 | 1 | | 28906382 | Body;TSS1500;Body | | N_Shore | |
| cg02007288 | | GTF2E2 | -0,33 | 8 | | 30513708 | 5'UTR | | N_Shore | |
| cg04507925 | | UNC80;UNC80 | -0,33 | 2 | | 210824770 | Body;Body | |  | |
| cg23434815 | | VCL;VCL | -0,33 | 10 | | 75839302 | Body;Body | |  | |
| cg11003133 | | AIM2 | -0,33 | 1 | | 159046391 | 5'UTR | |  | |
| cg08947084 | | SNORD47;GAS5;SNORD81;SNORD80 | -0,33 | 1 | | 173834077 | TSS1500;Body;TSS1500;TSS200 | | N_Shelf | |
| cg26337954 | | CD96;ZBED2;CD96 | -0,33 | 3 | | 111315207 | Body;TSS1500;Body | |  | |
| cg23728359 | | CYTH3 | -0,33 | 7 | | 6290148 | Body | |  | |
| cg13613174 | | D2HGDH | -0,33 | 2 | | 242702881 | Body | |  | |
| cg08146256 | | HNRNPC;HNRNPC;HNRNPC;HNRNPC | -0,33 | 14 | | 21734410 | 5'UTR;5'UTR;5'UTR;5'UTR | | N_Shelf | |
| cg19645639 | | SLC16A1 | -0,33 | 1 | | 113500384 | TSS1500 | | S_Shore | |
| cg16810031 | | ZPBP2;ZPBP2 | -0,33 | 17 | | 38024146 | TSS1500;TSS1500 | | Island | |
| cg06238667 | | KIF13B | -0,33 | 8 | | 29086832 | Body | |  | |
| cg07861456 | | ADAT1 | -0,33 | 16 | | 75654252 | Body | | N_Shelf | |
| cg17777683 | | CFLAR;CFLAR;CFLAR | -0,33 | 2 | | 201986522 | 5'UTR;5'UTR;5'UTR | | S_Shelf | |
| cg01965380 | | LRRC8D;LRRC8D | -0,33 | 1 | | 90321064 | 5'UTR;5'UTR | |  | |
| cg19055323 | | KRTAP4-1 | -0,33 | 17 | | 39341434 | TSS1500 | |  | |
| cg11940177 | | PGAM1 | -0,33 | 10 | | 99188478 | Body | | S_Shelf | |
| cg15078975 | | EED;EED | -0,33 | 11 | | 85958536 | Body;Body | | S_Shelf | |
| cg05631194 | | PSORS1C3 | -0,33 | 6 | | 31146417 | TSS1500 | | N_Shore | |
| cg12367786 | | KCNJ6 | -0,33 | 21 | | 39290161 | TSS1500 | | S_Shore | |
| cg20684197 | | FGF1;FGF1;FGF1;FGF1;FGF1;FGF1 | -0,33 | 5 | | 142066938 | 5'UTR;5'UTR;TSS1500;TSS1500;Body;Body | |  | |
| cg02202664 | | TIAM2;TIAM2 | -0,33 | 6 | | 155545253 | Body;5'UTR | |  | |
| cg14585353 | | ZPBP2;ZPBP2 | -0,33 | 17 | | 38023679 | TSS1500;TSS1500 | | N_Shore | |
| cg18932740 | | HSPA1L | -0,33 | 6 | | 31780562 | 5'UTR | | N_Shelf | |
| cg23525051 | | RASGRP1;RASGRP1 | -0,33 | 15 | | 38852680 | Body;Body | | N_Shelf | |
| cg18835865 | | FRMD6 | -0,33 | 14 | | 52020726 | 5'UTR | |  | |
| cg11904429 | | CD70 | -0,33 | 19 | | 6592554 | TSS1500 | | S_Shore | |
| cg24082174 | | SNORA63;MIR1248;EIF4A2;SNORA81 | -0,33 | 3 | | 186503643 | TSS1500;TSS1500;Body;TSS1500 | | S_Shore | |
| cg00415939 | | PICALM;PICALM | -0,33 | 11 | | 85772935 | Body;Body | |  | |
| cg11667301 | | SNORD70;NOP58 | -0,33 | 2 | | 203141235 | Body;Body | |  | |
| cg15484808 | | RPS18 | -0,33 | 6 | | 33242542 | Body | | N_Shelf | |
| cg11837417 | | CLDND2 | -0,33 | 19 | | 51873544 | TSS1500 | | S_Shore | |
| cg02621376 | | MCOLN2 | -0,33 | 1 | | 85461303 | Body | | N_Shore | |
| cg22208022 | | ATF7IP | -0,33 | 12 | | 14553107 | 5'UTR | |  | |
| cg25978218 | | EFHD2 | -0,33 | 1 | | 15738732 | Body | | S_Shore | |
| cg18087514 | | KMO | -0,33 | 1 | | 241696246 | Body | |  | |
| cg23638518 | | C6orf64 | -0,33 | 6 | | 39080067 | Body | | N_Shelf | |
| cg23654401 | | VOPP1 | -0,33 | 7 | | 55606442 | Body | |  | |
| cg27374881 | | SNORA63;MIR1248;EIF4A2;SNORA81;SNORA4 | -0,33 | 3 | | 186504006 | TSS1500;TSS1500;Body;TSS1500;TSS1500 | | S_Shore | |
| cg17408380 | | RPL23A;SNORD4A;SNORD42A | -0,33 | 17 | | 27049137 | Body;TSS1500;TSS1500 | | S_Shore | |
| cg00490406 | | AIM2 | -0,33 | 1 | | 159046773 | TSS200 | |  | |
| cg13714407 | | RAPGEF1 | -0,32 | 9 | | 134604212 | Body | |  | |
| cg02766539 | | TMEM49 | -0,32 | 17 | | 57861641 | Body | |  | |
| cg17560340 | | RNMTL1;GLOD4 | -0,32 | 17 | | 684490 | TSS1500;Body | | N_Shore | |
| cg17448192 | | ST6GAL1;ST6GAL1 | -0,32 | 3 | | 186718821 | 5'UTR;5'UTR | |  | |
| cg24634526 | | HAO1 | -0,32 | 20 | | 7921905 | TSS1500 | |  | |
| cg23839680 | | CCT6A;PSPH;CCT6A | -0,32 | 7 | | 56118238 | TSS1500;5'UTR;TSS1500 | | N_Shore | |
| cg17741993 | | TNF | -0,32 | 6 | | 31544694 | Body | | N_Shelf | |
| cg03421440 | | BRDT | -0,32 | 1 | | 92414520 | TSS1500 | | N_Shore | |
| cg05266321 | | CCR2 | -0,32 | 3 | | 46401927 | 3'UTR | |  | |
| cg11786338 | | SEC11C | -0,32 | 18 | | 56809717 | Body | | S_Shelf | |
| cg23304023 | | TACC2;TACC2;TACC2;TACC2 | -0,32 | 10 | | 123949949 | Body;Body;Body;Body | |  | |
| cg12706330 | | GHITM | -0,32 | 10 | | 85898700 | TSS1500 | | N_Shore | |
| cg18399451 | | ATXN1;ATXN1 | -0,32 | 6 | | 16421273 | 5'UTR;5'UTR | |  | |
| cg06538345 | | RPL13AP5;SNORD33;SNORD35A;SNORD34;RPL13A;SNORD32A | -0,32 | 19 | | 49993186 | Body;TSS1500;TSS1500;TSS1500;Body;TSS200 | | S_Shore | |
| cg14679780 | | ZBTB7A | -0,32 | 19 | | 4059525 | 5'UTR | | N_Shore | |
| cg14825736 | | FGF1;FGF1;FGF1;FGF1 | -0,32 | 5 | | 142077949 | TSS1500;TSS1500;TSS1500;TSS1500 | |  | |
| cg20146177 | | HAS2 | -0,32 | 8 | | 122639115 | Body | |  | |
| cg19411729 | | CCL5 | -0,32 | 17 | | 34207663 | TSS1500 | |  | |
| cg24797431 | | CHRNB3 | -0,32 | 8 | | 42553592 | Body | |  | |
| cg21033632 | | ADAMTS6 | -0,32 | 5 | | 64486421 | Body | |  | |
| cg16789764 | | ZC3H14;ZC3H14;ZC3H14;ZC3H14;ZC3H14;ZC3H14 | -0,32 | 14 | | 89066213 | Body;Body;Body;Body;Body;Body | |  | |
| cg02532700 | | NCF4;NCF4 | -0,32 | 22 | | 37257404 | Body;Body | |  | |
| cg01360627 | | TNF | -0,32 | 6 | | 31544931 | Body | | N_Shelf | |
| cg07842386 | | IL23R | -0,32 | 1 | | 67632028 | TSS200 | |  | |
| cg08548498 | | SLPI | -0,32 | 20 | | 43883546 | TSS1500 | |  | |
| cg20475005 | | WASL | -0,32 | 7 | | 123351286 | Body | |  | |
| cg27062514 | | CTR9 | -0,32 | 11 | | 10800841 | 3'UTR | |  | |
| cg26607897 | | CREG1 | -0,32 | 1 | | 167510839 | 3'UTR | |  | |
| cg14171514 | | AHNAK;AHNAK | -0,32 | 11 | | 62308492 | 5'UTR;5'UTR | |  | |
| cg11389889 | | NOP56;NOP56;SNORD110;SNORA51 | -0,32 | 20 | | 2634874 | Body;Body;Body;TSS1500 | | S_Shore | |
| cg02048922 | | BAI1 | -0,31 | 8 | | 143546858 | Body | | S_Shore | |
| cg03669394 | | TERF2IP | -0,31 | 16 | | 75685254 | Body | | S_Shelf | |
| cg25734089 | | PNMAL1;PNMAL1 | -0,31 | 19 | | 46969919 | 3'UTR;3'UTR | |  | |
| cg08455089 | | TBC1D22B | -0,31 | 6 | | 37292135 | Body | |  | |
| cg19051213 | | IWS1 | -0,31 | 2 | | 128281334 | Body | | N_Shelf | |
| cg11576424 | | C5orf56 | -0,31 | 5 | | 131750756 | 5'UTR | | S_Shelf | |
| cg13375187 | | THBS1 | -0,31 | 15 | | 39886363 | Body | |  | |
| cg03396826 | | QSOX1;QSOX1 | -0,31 | 1 | | 180161452 | Body;Body | |  | |
| cg15759721 | | MIR21 | -0,31 | 17 | | 57918630 | Body | |  | |
| cg09152813 | | NCK2;NCK2 | -0,31 | 2 | | 106391379 | 5'UTR;5'UTR | |  | |
| cg26227465 | | IFNG | -0,31 | 12 | | 68553577 | TSS200 | |  | |
| cg02867514 | | CCL5;CCL5 | -0,31 | 17 | | 34207341 | 1stExon;5'UTR | |  | |
| cg04112100 | | KYNU;KYNU | -0,31 | 2 | | 143701758 | Body;Body | |  | |
| cg24049629 | | RASSF1;RASSF1;RASSF1 | -0,31 | 3 | | 50376475 | TSS1500;Body;Body | | N_Shore | |
| cg23985641 | | FAM50B | -0,31 | 6 | | 3848218 | TSS1500 | | N_Shore | |
| cg21301505 | | SLAMF8;SLAMF8 | -0,31 | 1 | | 159796629 | 5'UTR;1stExon | |  | |
| cg00670721 | | SNORA63;MIR1248;EIF4A2;SNORA81;SNORA4 | -0,31 | 3 | | 186504202 | TSS1500;TSS1500;Body;TSS1500;TSS1500 | | S_Shelf | |
| cg10177030 | | C20orf199;C20orf199;SNORD12;C20orf199 | -0,31 | 20 | | 47897207 | Body;Body;TSS200;Body | | S_Shelf | |
| cg11130955 | | IFLTD1;IFLTD1;IFLTD1;IFLTD1;IFLTD1 | -0,31 | 12 | | 25656194 | Body;3'UTR;3'UTR;3'UTR;3'UTR | |  | |
| cg09676484 | | NME1;NME1-NME2;NME1 | -0,31 | 17 | | 49232155 | 5'UTR;5'UTR;Body | | S_Shore | |
| cg03906075 | | SNORD93 | -0,31 | 7 | | 22894898 | TSS1500 | | S_Shore | |
| cg15704872 | | SLC9A2 | -0,31 | 2 | | 103239842 | Body | | S_Shelf | |
| cg04410448 | | C6orf94 | -0,31 | 6 | | 144223614 | Body | |  | |
| cg13845133 | | PBX1 | -0,31 | 1 | | 164544496 | Body | | N_Shore | |
| cg02150910 | | GZMH | -0,31 | 14 | | 25079357 | TSS1500 | |  | |
| cg26252045 | | ABTB2 | -0,31 | 11 | | 34256703 | Body | |  | |
| cg12742178 | | IGF1;IGF1;IGF1;IGF1 | -0,31 | 12 | | 102815929 | Body;Body;Body;Body | |  | |
| cg04749873 | | NCOA2 | -0,31 | 8 | | 71039880 | Body | |  | |
| cg26328951 | | SNHG12;SNORD99;SNORA61 | -0,31 | 1 | | 28906514 | Body;TSS1500;TSS200 | | N_Shore | |
| cg18091269 | | CCDC46;CCDC46 | -0,31 | 17 | | 63822838 | TSS200;Body | |  | |
| cg15253861 | | HLA-DPA1 | -0,31 | 6 | | 33040743 | Body | |  | |
| cg12898019 | | ST6GALNAC1 | -0,31 | 17 | | 74621049 | 3'UTR | |  | |
| cg23208285 | | IL5 | -0,31 | 5 | | 131879579 | TSS1500 | |  | |
| cg14558716 | | ATF1 | -0,31 | 12 | | 51178930 | Body | |  | |
| cg04863679 | | TBL1XR1 | -0,31 | 3 | | 176759870 | Body | |  | |
| cg16565409 | | RPL23A;SNORD4A | -0,31 | 17 | | 27048223 | Body;TSS1500 | | S_Shore | |
| cg10973762 | | DUT;DUT;DUT | -0,31 | 15 | | 48625931 | Body;Body;Body | | S_Shore | |
| cg10432569 | | MIR196A1 | -0,31 | 17 | | 46709858 | Body | | N_Shore | |
| cg19926250 | | GPR87;MED12L;GPR87 | -0,31 | 3 | | 151034474 | 5'UTR;Body;1stExon | |  | |
| cg15909056 | | LGR5 | -0,31 | 12 | | 71837175 | Body | | S_Shelf | |
| cg08328483 | | BCKDK;BCKDK | -0,31 | 16 | | 31119196 | TSS1500;TSS1500 | | N_Shore | |
| cg08822075 | | NFE2L3 | -0,31 | 7 | | 26193607 | Body | | S_Shore | |
| cg27041424 | | VWF | -0,31 | 12 | | 6232979 | 5'UTR | |  | |
| cg07033395 | | SNHG12;SNORD99;SNORA61 | -0,31 | 1 | | 28906538 | Body;TSS1500;TSS200 | | N_Shore | |
| cg22809683 | | LAMC1 | -0,31 | 1 | | 182998916 | Body | |  | |
| cg20831413 | | ARAP1 | -0,31 | 11 | | 72460551 | 5'UTR | | N_Shelf | |
| cg21625817 | | SLC27A2;SLC27A2 | -0,31 | 15 | | 50475495 | Body;Body | | S_Shore | |
| cg17316747 | | DIRC3 | -0,31 | 2 | | 218149237 | Body | |  | |
| cg02663352 | | CD44;CD44;CD44;CD44;CD44 | -0,30 | 11 | | 35167041 | Body;Body;Body;Body;Body | |  | |
| cg01794245 | | KIAA1688 | -0,30 | 8 | | 145839459 | TSS1500 | |  | |
| cg24699146 | | HMGCL;HMGCL | -0,30 | 1 | | 24152579 | TSS1500;TSS1500 | |  | |
| cg16336556 | | LTBP1 | -0,30 | 2 | | 33295138 | Body | |  | |
| cg04625338 | | EGFR;EGFR;EGFR;EGFR | -0,30 | 7 | | 55141971 | Body;Body;Body;Body | |  | |
| cg23265210 | | AMOTL1 | -0,30 | 11 | | 94536536 | Body | |  | |
| cg02077256 | | PMP22;PMP22;PMP22 | -0,30 | 17 | | 15133981 | 3'UTR;3'UTR;3'UTR | |  | |
| cg16704590 | | C20orf199;C20orf199;SNORD12B;SNORD12;MIR1259;C20orf199 | -0,30 | 20 | | 47896769 | Body;Body;TSS200;TSS1500;TSS200;Body | | S_Shore | |
| cg14232851 | | GNA14 | -0,30 | 9 | | 80111634 | Body | |  | |
| cg12510708 | | NFE2L3 | -0,30 | 7 | | 26193805 | Body | | S_Shore | |
| cg02650512 | | RPL23A;SNORD4A;SNORD42A | -0,30 | 17 | | 27048975 | Body;TSS1500;TSS1500 | | S_Shore | |
| cg22583147 | | C3orf77 | -0,30 | 3 | | 44331824 | Body | |  | |
| cg06791592 | | PSMB9;PSMB9 | -0,30 | 6 | | 32823292 | Body;Body | | S_Shore | |
| cg19083007 | | RCAN2 | -0,30 | 6 | | 46293862 | TSS1500 | |  | |
| cg01940810 | | IFNG | -0,30 | 12 | | 68551655 | Body | |  | |
| cg17036641 | | GNL3;GNL3;GNL3;SNORD19B | -0,30 | 3 | | 52723544 | Body;Body;Body;TSS1500 | | S_Shelf | |
| cg07623116 | | C2orf82 | -0,30 | 2 | | 233734064 | TSS1500 | |  | |
| cg24067911 | | ATXN1;ATXN1 | -0,30 | 6 | | 16729610 | 5'UTR;5'UTR | |  | |
| cg00753399 | | MOBKL1B | -0,30 | 2 | | 74404556 | Body | | N_Shore | |
| cg16680125 | | LGTN | -0,30 | 1 | | 206782805 | Body | | N_Shelf | |
| cg18721397 | | SUB1 | -0,30 | 5 | | 32584912 | TSS1500 | | N_Shore | |
| cg06202778 | | HOPX;HOPX;HOPX;HOPX;HOPX | -0,30 | 4 | | 57514827 | 3'UTR;3'UTR;3'UTR;3'UTR;3'UTR | |  | |
| cg17702736 | | SLC26A8;SLC26A8 | -0,30 | 6 | | 35941709 | Body;Body | |  | |
| cg18756771 | | DUSP5 | -0,30 | 10 | | 112261994 | Body | | S_Shelf | |
| cg26247064 | | RNF169 | -0,30 | 11 | | 74466198 | Body | |  | |
| cg22949256 | | SGIP1 | -0,30 | 1 | | 67135552 | Body | |  | |
| cg06539006 | | CPO | -0,30 | 2 | | 207814687 | Body | |  | |
| cg24755931 | | CDC42BPB | -0,30 | 14 | | 103407195 | Body | | S_Shore | |
| cg18376306 | | RABGGTB;SNORD45B | -0,30 | 1 | | 76254508 | Body;TSS1500 | |  | |
| cg06889086 | | VOPP1 | -0,30 | 7 | | 55638230 | Body | | N_Shore | |
| cg25246082 | | TMEM156 | -0,30 | 4 | | 39034284 | TSS1500 | |  | |
| cg01234248 | | RASSF8;RASSF8;RASSF8 | -0,30 | 12 | | 26150045 | 5'UTR;5'UTR;5'UTR | |  | |
| cg08373989 | | HSPA1L | -0,30 | 6 | | 31780239 | 5'UTR | | N_Shelf | |
| cg14959260 | | SLC2A9;SLC2A9 | -0,30 | 4 | | 9917839 | Body;Body | |  | |
| cg06496272 | | SNORD93 | -0,30 | 7 | | 22895283 | TSS1500 | | S_Shore | |
| cg06893362 | | C20orf199;C20orf199;SNORD12;C20orf199 | -0,30 | 20 | | 47897124 | Body;Body;TSS200;Body | | S_Shore | |
| cg05819223 | | ROR1;ROR1 | -0,30 | 1 | | 64445499 | Body;Body | |  | |
| cg04131610 | | CCR5;CCR5 | -0,30 | 3 | | 46411447 | TSS200;TSS200 | |  | |
| cg25531857 | | C20orf199;C20orf199;C20orf199 | -0,30 | 20 | | 47897451 | Body;Body;Body | | S_Shelf | |
| cg12583553 | | RPS18 | -0,30 | 6 | | 33242487 | Body | | N_Shelf | |
| cg16736889 | | ACSM5 | -0,30 | 16 | | 20421627 | 5'UTR | |  | |
| cg10037072 | | POU6F2;POU6F2 | -0,30 | 7 | | 39082429 | Body;Body | |  | |
| cg01754967 | | WDR72 | -0,30 | 15 | | 54049269 | 5'UTR | | N_Shelf | |
| cg21159568 | | CHST12 | -0,30 | 7 | | 2445331 | 5'UTR | | S_Shore | |
| cg06040872 | | CCL18 | -0,30 | 17 | | 34394215 | Body | |  | |
| cg02795981 | | ZMIZ1 | -0,30 | 10 | | 81045119 | Body | |  | |
| cg26837708 | | YBX1 | -0,30 | 1 | | 43149980 | Body | | S_Shore | |
| cg17689490 | | DOCK1;FAM196A | -0,30 | 10 | | 128952444 | Body;Body | |  | |
| cg16408856 | | VWA3B | -0,30 | 2 | | 98808235 | Body | |  | |
| cg13591783 | | ANXA1 | -0,30 | 9 | | 75768868 | 5'UTR | |  | |
| cg26193268 | | HCG18;HCG18 | -0,30 | 6 | | 30290443 | Body;Body | | N_Shelf | |
| cg12629008 | | DAB1 | -0,30 | 1 | | 58625006 | 5'UTR | |  | |
| cg03607573 | | TAF1D | -0,30 | 11 | | 93471889 | Body | | N_Shelf | |
| cg00045515 | | RBL1;RBL1 | -0,30 | 20 | | 35723332 | Body;Body | | N_Shore | |
| cg23461824 | | CALD1;CALD1;CALD1;CALD1;CALD1 | -0,30 | 7 | | 134605363 | Body;Body;Body;Body;Body | |  | |
| cg20821314 | | PDIA6 | -0,30 | 2 | | 10950732 | Body | | N_Shore | |
| cg10431989 | | HHLA2 | -0,30 | 3 | | 108021214 | TSS200 | |  | |
| cg07846061 | | MLKL;MLKL | -0,30 | 16 | | 74732434 | 5'UTR;5'UTR | | N_Shore | |
| cg01062020 | | SH2D1B | -0,30 | 1 | | 162382848 | TSS1500 | |  | |
| cg15906260 | | SNORA4;EIF4A2 | -0,30 | 3 | | 186505240 | TSS200;Body | | S_Shelf | |
| cg10489672 | | CD2 | -0,30 | 1 | | 117296494 | TSS1500 | |  | |
| cg01561807 | | ATP4B | -0,30 | 13 | | 114307602 | Body | |  | |
| cg17352276 | | SNORD16;RPL4;SNORD18B | -0,30 | 15 | | 66795208 | Body;Body;TSS1500 | |  | |
| cg05046721 | | KIAA1026;KIAA1026 | -0,30 | 1 | | 15208255 | Body;Body | |  | |
| cg20495370 | | SLC7A7;SLC7A7;SLC7A7 | -0,29 | 14 | | 23266481 | Body;Body;Body | |  | |
| cg02573743 | | NEDD4;NEDD4 | -0,29 | 15 | | 56120298 | 3'UTR;3'UTR | |  | |
| cg20863321 | | HDLBP | -0,29 | 2 | | 242250819 | 5'UTR | | N_Shelf | |
| cg05307752 | | ARHGAP15 | -0,29 | 2 | | 144462886 | Body | |  | |
| cg09501047 | | PBX1 | -0,29 | 1 | | 164615911 | Body | |  | |
| cg00783712 | | CHRM3 | -0,29 | 1 | | 239974513 | 5'UTR | |  | |
| cg10499651 | | PPARG;PPARG;PPARG;PPARG | -0,29 | 3 | | 12465415 | Body;Body;Body;Body | |  | |
| cg11729430 | | CRYGA | -0,29 | 2 | | 209028478 | TSS200 | |  | |
| cg20411384 | | CDK14 | -0,29 | 7 | | 90670577 | Body | |  | |
| cg04951104 | | MEOX1;MEOX1;MEOX1 | -0,29 | 17 | | 41739195 | TSS1500;5'UTR;TSS1500 | |  | |
| cg14338590 | | PLEKHA7 | -0,29 | 11 | | 16848924 | Body | |  | |
| cg07165260 | | KIAA0513 | -0,29 | 16 | | 85062881 | 5'UTR | | S_Shore | |
| cg15025240 | | C2orf65 | -0,29 | 2 | | 74811430 | Body | |  | |
| cg25189764 | | FYN;FYN | -0,29 | 6 | | 112079056 | 5'UTR;5'UTR | |  | |
| cg26870746 | | TAGAP;TAGAP;TAGAP | -0,29 | 6 | | 159463173 | 5'UTR;Body;Body | |  | |
| cg22827827 | | HSPE1 | -0,29 | 2 | | 198367525 | Body | | S_Shelf | |
| cg24115681 | | MDFIC;MDFIC | -0,29 | 7 | | 114566161 | Body;Body | | S_Shelf | |
| cg10217292 | | LPCAT1 | -0,29 | 5 | | 1491600 | Body | | S_Shore | |
| cg23493867 | | SYNPO2;SYNPO2;SYNPO2 | -0,29 | 4 | | 119941819 | Body;Body;Body | |  | |
| cg09353052 | | SCN1A;SCN1A;SCN1A | -0,29 | 2 | | 166847297 | 3'UTR;3'UTR;3'UTR | |  | |
| cg21187669 | | ATPAF2 | -0,29 | 17 | | 17929033 | Body | |  | |
| cg07579107 | | WDR72 | -0,29 | 15 | | 53910786 | Body | |  | |
| cg00757822 | | PLCH1;PLCH1;PLCH1 | -0,29 | 3 | | 155304922 | Body;Body;Body | |  | |
| cg07625783 | | SLAMF8;SLAMF8 | -0,29 | 1 | | 159796617 | 5'UTR;1stExon | |  | |
| cg21919820 | | JAZF1 | -0,29 | 7 | | 28081543 | Body | |  | |
| cg13598358 | | PPP1CC | -0,29 | 12 | | 111176852 | Body | | N_Shelf | |
| cg10994564 | | ADPRH | -0,29 | 3 | | 119306022 | Body | |  | |
| cg26531286 | | FARP1;FARP1 | -0,29 | 13 | | 98799358 | 5'UTR;5'UTR | | S_Shelf | |
| cg00078299 | | ZHX1;ZHX1 | -0,29 | 8 | | 124284379 | 5'UTR;5'UTR | | N_Shore | |
| cg15278374 | | GPR133 | -0,29 | 12 | | 131576088 | Body | | S_Shelf | |
| cg00829858 | | OSBPL6 | -0,29 | 2 | | 179148245 | 5'UTR | |  | |
| cg02721693 | | C1orf14 | -0,29 | 1 | | 182922705 | TSS200 | | S_Shore | |
| cg25783892 | | GHITM | -0,29 | 10 | | 85898649 | TSS1500 | | N_Shore | |
| cg05919685 | | APCS | -0,29 | 1 | | 159556997 | TSS1500 | |  | |
| cg08769212 | | TMEM175 | -0,29 | 4 | | 930351 | 5'UTR | | S_Shelf | |
| cg20587874 | | MIR548N | -0,29 | 2 | | 179269232 | Body | |  | |
| cg03516026 | | C1orf89 | -0,29 | 1 | | 16564651 | TSS1500 | | S_Shore | |
| cg08656816 | | CCL5 | -0,29 | 17 | | 34207454 | TSS200 | |  | |
| cg16296417 | | NSMCE2 | -0,29 | 8 | | 126285443 | Body | |  | |
| cg10489463 | | LTBP1;LTBP1;LTBP1;LTBP1;LTBP1 | -0,29 | 2 | | 33546572 | Body;Body;Body;Body;Body | |  | |
| cg00163459 | | MKKS;MKKS | -0,29 | 20 | | 10411528 | 5'UTR;5'UTR | | N_Shelf | |
| cg09960641 | | LOC100128675;LOC100128675 | -0,29 | 19 | | 35598494 | TSS1500;TSS1500 | |  | |
| cg02792136 | | DIP2C | -0,29 | 10 | | 590541 | Body | |  | |
| cg06245711 | | FAM100B | -0,29 | 17 | | 74260776 | TSS1500 | | N_Shore | |
| cg18623836 | | RRM2;RRM2 | -0,29 | 2 | | 10261907 | TSS1500;TSS1500 | | N_Shore | |
| cg14945086 | | SMCHD1 | -0,29 | 18 | | 2657780 | Body | | S_Shore | |
| cg11336061 | | RUNX3;RUNX3 | -0,29 | 1 | | 25254149 | Body;Body | | N_Shore | |
| cg06641503 | | ARIH2 | -0,29 | 3 | | 48959341 | 5'UTR | | S_Shelf | |
| cg10995381 | | MTRR;MTRR | -0,29 | 5 | | 7877198 | Body;Body | |  | |
| cg16729555 | | FCAMR;FCAMR;FCAMR;FCAMR;FCAMR;FCAMR;FCAMR | -0,29 | 1 | | 207143533 | 5'UTR;5'UTR;1stExon;1stExon;5'UTR;1stExon;5'UTR | |  | |
| cg17680611 | | TPM4;TPM4 | -0,29 | 19 | | 16191217 | Body;Body | | S_Shelf | |
| cg13727618 | | INSR;INSR | -0,29 | 19 | | 7145317 | Body;Body | | S_Shelf | |
| cg02578087 | | C3orf32 | -0,29 | 3 | | 8671361 | Body | |  | |
| cg23628721 | | FRK | -0,29 | 6 | | 116332682 | Body | |  | |
| cg02009395 | | ACSM1 | -0,29 | 16 | | 20702744 | TSS200 | |  | |
| cg27229100 | | SNORD12;C20orf199;C20orf199;C20orf199 | -0,29 | 20 | | 47897260 | Body;Body;Body;Body | | S_Shelf | |
| cg14349078 | | PCSK5 | -0,29 | 9 | | 78547359 | Body | |  | |
| cg08462194 | | PHF1;PHF1;PHF1 | -0,29 | 6 | | 33384179 | Body;3'UTR;3'UTR | | N_Shore | |
| cg19622623 | | RASSF9 | -0,29 | 12 | | 86230825 | TSS1500 | |  | |
| cg05941376 | | WWC1;WWC1;WWC1 | -0,29 | 5 | | 167836834 | Body;Body;Body | |  | |
| cg08321111 | | SCAMP1 | -0,29 | 5 | | 77701852 | Body | |  | |
| cg22799757 | | SCRN1;SCRN1;SCRN1;SCRN1 | -0,29 | 7 | | 29997642 | Body;Body;Body;5'UTR | |  | |
| cg03503046 | | ZFPM2 | -0,29 | 8 | | 106595191 | Body | |  | |
| cg11631011 | | CCDC70 | -0,29 | 13 | | 52436047 | TSS200 | |  | |
| cg26562691 | | PRKCB;PRKCB | -0,29 | 16 | | 23850404 | Body;Body | | S_Shelf | |
| cg09341730 | | LEUTX | -0,29 | 19 | | 40269534 | 5'UTR | |  | |
| cg08105590 | | FAM38A | -0,29 | 16 | | 88849599 | Body | | N_Shore | |
| cg22388608 | | DEFB133 | -0,29 | 6 | | 49917254 | TSS200 | |  | |
| cg26525313 | | HECA | -0,29 | 6 | | 139466669 | Body | |  | |
| cg12946660 | | HNRNPUL1;HNRNPUL1 | -0,29 | 19 | | 41771873 | Body;5'UTR | | S_Shore | |
| cg05696969 | | SH3RF2 | -0,29 | 5 | | 145326228 | Body | |  | |
| cg19409133 | | SNHG3-RCC1;RCC1;SNHG3-RCC1;RCC1;SNHG3-RCC1;RCC1 | -0,29 | 1 | | 28843744 | Body;TSS1500;Body;TSS1500;5'UTR;TSS1500 | | N_Shore | |
| cg05501617 | | IRF2 | -0,29 | 4 | | 185339075 | Body | |  | |
| cg13696490 | | LOC201651 | -0,29 | 3 | | 151488006 | TSS1500 | |  | |
| cg24427243 | | TNFRSF8 | -0,29 | 1 | | 12128100 | Body | | S_Shelf | |
| cg20588868 | | LGI1 | -0,29 | 10 | | 95551111 | Body | |  | |
| cg01400040 | | RORA | -0,29 | 15 | | 61091220 | Body | |  | |
| cg06764092 | | SLAMF8;SLAMF8 | -0,29 | 1 | | 159796658 | 5'UTR;1stExon | |  | |
| cg04579254 | | SP140;SP140 | -0,28 | 2 | | 231090745 | Body;Body | |  | |
| cg09345868 | | SAMD3;SAMD3 | -0,28 | 6 | | 130537970 | 5'UTR;TSS1500 | |  | |
| cg12240358 | | HOMER2;HOMER2;HOMER2;HOMER2 | -0,28 | 15 | | 83619523 | Body;Body;Body;Body | | N_Shore | |
| cg26681383 | | CACNA2D3 | -0,28 | 3 | | 54700753 | Body | |  | |
| cg11571124 | | CLIP1;CLIP1 | -0,28 | 12 | | 122851438 | Body;Body | |  | |
| cg09914444 | | DMBX1;DMBX1 | -0,28 | 1 | | 46972183 | TSS1500;TSS1500 | |  | |
| cg00103398 | | SNORD47;GAS5;SNORD81;SNORD80 | -0,28 | 1 | | 173834155 | TSS1500;Body;TSS1500;TSS200 | | N_Shelf | |
| cg12126706 | | C1orf92 | -0,28 | 1 | | 156889128 | TSS1500 | | N_Shore | |
| cg27305009 | | WIPF1;WIPF1 | -0,28 | 2 | | 175471320 | 5'UTR;5'UTR | |  | |
| cg10852045 | | ADAM32 | -0,28 | 8 | | 38970773 | Body | |  | |
| cg25968937 | | DOK6 | -0,28 | 18 | | 67139481 | Body | | S_Shelf | |
| cg27193735 | | CDK14 | -0,28 | 7 | | 90562815 | Body | |  | |
| cg24539090 | | IFI16 | -0,28 | 1 | | 158978504 | TSS1500 | |  | |
| cg06404572 | | ASAP1 | -0,28 | 8 | | 131374842 | Body | | S_Shelf | |
| cg17618872 | | CBFA2T2;CBFA2T2;CBFA2T2 | -0,28 | 20 | | 32235621 | 3'UTR;3'UTR;3'UTR | | S_Shelf | |
| cg25481253 | | TAS2R38 | -0,28 | 7 | | 141673384 | 1stExon | |  | |
| cg14714222 | | PREX1 | -0,28 | 20 | | 47440761 | Body | | N_Shelf | |
| cg26186331 | | DAB2 | -0,28 | 5 | | 39415351 | 5'UTR | |  | |
| cg08909961 | | MSH4 | -0,28 | 1 | | 76262984 | Body | | S_Shore | |
| cg12930930 | | OR51B6 | -0,28 | 11 | | 5372503 | TSS1500 | |  | |
| cg24759654 | | USP36 | -0,28 | 17 | | 76801065 | Body | | S_Shelf | |
| cg12019893 | | ZNF662;ZNF662 | -0,28 | 3 | | 42950090 | Body;Body | | S_Shore | |
| cg11064744 | | PPP3CB;PPP3CB;PPP3CB | -0,28 | 10 | | 75227339 | Body;Body;Body | |  | |
| cg09217157 | | ENTPD1;ENTPD1;ENTPD1;ENTPD1;ENTPD1;ENTPD1;ENTPD1 | -0,28 | 10 | | 97624891 | Body;Body;Body;Body;Body;Body;Body | |  | |
| cg17759095 | | DST | -0,28 | 6 | | 56755566 | Body | |  | |
| cg14496375 | | CLDND2 | -0,28 | 19 | | 51872365 | TSS200 | | S_Shore | |
| cg01604946 | | SH3TC2 | -0,28 | 5 | | 148398804 | Body | |  | |
| cg22669120 | | KCNA1 | -0,28 | 12 | | 5024586 | 3'UTR | | S_Shelf | |
| cg22083298 | | TKTL2 | -0,28 | 4 | | 164395287 | TSS1500 | | S_Shore | |
| cg22454313 | | NAV1;NAV1 | -0,28 | 1 | | 201722809 | Body;Body | |  | |
| cg25596287 | | SNHG3-RCC1;RCC1;SNHG3-RCC1;RCC1;SNHG3-RCC1;RCC1 | -0,28 | 1 | | 28843736 | Body;TSS1500;Body;TSS1500;5'UTR;TSS1500 | | N_Shore | |
| cg21560697 | | TAF1B | -0,28 | 2 | | 10054883 | Body | |  | |
| cg02902946 | | SLMO2 | -0,28 | 20 | | 57617168 | Body | | N_Shore | |
| cg16313807 | | HSBP1L1 | -0,28 | 18 | | 77723226 | TSS1500 | | N_Shore | |
| cg26063719 | | VIM | -0,28 | 10 | | 17273187 | Body | | S_Shore | |
| cg23217527 | | LOC285205 | -0,28 | 3 | | 107639884 | Body | |  | |
| cg15353603 | | DPP4 | -0,28 | 2 | | 162915902 | Body | |  | |
| cg04813697 | | PIP4K2A | -0,28 | 10 | | 22920025 | Body | |  | |
| cg14431577 | | LRRC10;LRRC10 | -0,28 | 12 | | 70002985 | 1stExon;3'UTR | |  | |
| cg20417024 | | F2R | -0,28 | 5 | | 76028950 | Body | |  | |
| cg18707845 | | ARHGAP11A;ARHGAP11A | -0,28 | 15 | | 32909968 | Body;Body | | S_Shelf | |
| cg03655684 | | CLCN7;CLCN7 | -0,28 | 16 | | 1508785 | Body;Body | | S_Shore | |
| cg09712306 | | AURKA;AURKA;AURKA;AURKA;AURKA;AURKA | -0,28 | 20 | | 54949299 | Body;Body;Body;Body;Body;Body | |  | |
| cg18650307 | | DCAF16 | -0,28 | 4 | | 17809468 | 5'UTR | | N_Shelf | |
| cg15925478 | | BCAR3 | -0,28 | 1 | | 94081080 | Body | |  | |
| cg24055836 | | FAM190A;FAM190A | -0,28 | 4 | | 91689972 | Body;Body | |  | |
| cg03043406 | | RPS8;SNORD38A | -0,28 | 1 | | 45242356 | Body;TSS1500 | | S_Shore | |
| cg11721194 | | SLAMF7 | -0,28 | 1 | | 160709239 | Body | |  | |
| cg23737061 | | FHIT;FHIT | -0,28 | 3 | | 60226328 | Body;Body | |  | |
| cg24809269 | | FAM100B | -0,28 | 17 | | 74260692 | TSS1500 | | N_Shore | |
| cg25883149 | | MIR1471 | -0,28 | 2 | | 232757080 | TSS200 | |  | |
| cg07613153 | | TDRD9 | -0,28 | 14 | | 104436947 | Body | |  | |
| cg06477663 | | LCP1 | -0,28 | 13 | | 46757415 | TSS1500 | |  | |
| cg26478401 | | FAS;FAS;FAS;FAS;FAS;FAS;FAS;ACTA2 | -0,28 | 10 | | 90749920 | TSS1500;TSS1500;TSS1500;TSS1500;TSS1500;TSS1500;TSS1500;5'UTR | | N_Shore | |
| cg09183450 | | AHNAK;AHNAK | -0,28 | 11 | | 62308513 | 5'UTR;5'UTR | |  | |
| cg25508633 | | SNORD105;PPAN-P2RY11;PPAN | -0,28 | 19 | | 10218184 | TSS200;Body;Body | | S_Shore | |
| cg23533270 | | KCNMA1 | -0,28 | 10 | | 78635553 | 3'UTR | |  | |
| cg02323958 | | FAM49B | -0,28 | 8 | | 130930889 | 5'UTR | |  | |
| cg19811934 | | SLC24A4;SLC24A4;SLC24A4 | -0,28 | 14 | | 92927763 | Body;Body;Body | |  | |
| cg19746343 | | TOMM20 | -0,28 | 1 | | 235290405 | Body | | N_Shore | |
| cg13936847 | | PNPLA7;PNPLA7 | -0,28 | 9 | | 140406645 | Body;Body | |  | |
| cg02189597 | | RORA;RORA;RORA;RORA | -0,28 | 15 | | 60881071 | Body;Body;Body;Body | | N_Shelf | |
| cg20210051 | | PDZRN4;PDZRN4 | -0,28 | 12 | | 41830066 | TSS1500;Body | |  | |
| cg01957599 | | FAM13AOS | -0,28 | 4 | | 89631033 | Body | |  | |
| cg05337387 | | ST7;ST7 | -0,28 | 7 | | 116681233 | Body;Body | |  | |
| cg20663432 | | ANO2 | -0,28 | 12 | | 5696809 | Body | |  | |
| cg07418892 | | MCM3 | -0,28 | 6 | | 52150456 | TSS1500 | | S_Shore | |
| cg01297020 | | DAOA;DAOA;DAOA | -0,28 | 13 | | 106117425 | TSS1500;TSS1500;TSS1500 | |  | |
| cg21544416 | | LARP6 | -0,28 | 15 | | 71125838 | Body | |  | |
| cg07195224 | | AIM2 | -0,28 | 1 | | 159047034 | TSS1500 | |  | |
| cg13626632 | | STOM;STOM | -0,28 | 9 | | 124131165 | Body;Body | | N_Shore | |
| cg16247184 | | CCDC46;CCDC46;CCDC46 | -0,28 | 17 | | 63822421 | Body;1stExon;5'UTR | |  | |
| cg18657751 | | GAS7;GAS7;GAS7;GAS7 | -0,28 | 17 | | 9834056 | Body;Body;Body;Body | |  | |
| cg12383650 | | KCNMA1;KCNMA1;KCNMA1;KCNMA1 | -0,28 | 10 | | 79111034 | Body;Body;Body;Body | |  | |
| cg24743237 | | D2HGDH | -0,28 | 2 | | 242702932 | Body | |  | |
| cg19674091 | | IDH2 | -0,28 | 15 | | 90643766 | Body | | N_Shore | |
| cg14054990 | | KRTAP19-5 | -0,28 | 21 | | 31874502 | TSS200 | |  | |
| cg12311175 | | NDST3 | -0,28 | 4 | | 118975504 | Body | |  | |
| cg27288968 | | C21orf66;C21orf66 | -0,28 | 21 | | 34106765 | 3'UTR;Body | |  | |
| cg08491437 | | FUBP1 | -0,28 | 1 | | 78442533 | Body | | N_Shore | |
| cg25301649 | | MAML2 | -0,28 | 11 | | 96051764 | Body | |  | |
| cg05809481 | | ISG20L2 | -0,28 | 1 | | 156696467 | Body | | N_Shore | |
| cg10921592 | | HLA-DPA1 | -0,28 | 6 | | 33039414 | Body | |  | |
| cg00090787 | | RPL4;SNORD16;SNORD18B | -0,28 | 15 | | 66795345 | Body;TSS200;TSS1500 | |  | |
| cg02393640 | | LUZP6;MTPN | -0,28 | 7 | | 135660101 | 5'UTR;Body | | N_Shore | |
| cg21188652 | | RQCD1 | -0,28 | 2 | | 219435559 | Body | | S_Shore | |
| cg16104584 | | SLC2A5 | -0,28 | 1 | | 9149734 | TSS1500 | |  | |
| cg18028470 | | PIGV | -0,28 | 1 | | 27117061 | 5'UTR | | S_Shelf | |
| cg05352838 | | CUTA;CUTA;CUTA;CUTA;CUTA | -0,28 | 6 | | 33384391 | 3'UTR;3'UTR;3'UTR;3'UTR;3'UTR | | N_Shore | |
| cg07991100 | | DTHD1 | -0,28 | 4 | | 36283184 | TSS200 | |  | |
| cg06147361 | | SOX5 | -0,28 | 12 | | 24689930 | 5'UTR | |  | |
| cg05322332 | | FRAS1;FRAS1 | -0,28 | 4 | | 79176098 | Body;Body | |  | |
| cg18362281 | | DNAJB6 | -0,28 | 7 | | 157204364 | Body | | Island | |
| cg18442362 | | OGDH;OGDH;OGDH | -0,28 | 7 | | 44677772 | Body;Body;Body | |  | |
| cg15306060 | | RPL3;RNU86;RPL3 | -0,28 | 22 | | 39712956 | Body;TSS200;Body | | N_Shelf | |
| cg22118416 | | MGST2 | -0,28 | 4 | | 140621943 | Body | | S_Shelf | |
| cg03884270 | | SNORD87;SNHG6 | -0,28 | 8 | | 67834983 | TSS200;Body | | N_Shelf | |
| cg21536074 | | GLI3 | -0,28 | 7 | | 42105481 | Body | |  | |
| cg04291970 | | C8orf12 | -0,28 | 8 | | 11226339 | Body | |  | |
| cg14789659 | | ARID5B | -0,28 | 10 | | 63809073 | Body | |  | |
| cg11076160 | | DIAPH3 | -0,28 | 13 | | 60265793 | Body | |  | |
| cg03992323 | | TP53BP2;TP53BP2 | -0,28 | 1 | | 224023297 | Body;5'UTR | |  | |
| cg15036326 | | RPL23A;SNORD4A | -0,28 | 17 | | 27048708 | Body;TSS1500 | | S_Shore | |
| cg19929194 | | RAPGEF5 | -0,28 | 7 | | 22390378 | 5'UTR | |  | |
| cg20957316 | | SFRS7 | -0,28 | 2 | | 38976409 | Body | | N_Shore | |
| cg11107966 | | SLC24A4;SLC24A4;SLC24A4 | -0,28 | 14 | | 92927875 | Body;Body;Body | |  | |
| cg04880990 | | KRT6A | -0,28 | 12 | | 52887566 | TSS1500 | |  | |
| cg08498836 | | WWTR1;WWTR1;WWTR1 | -0,28 | 3 | | 149292366 | Body;Body;Body | |  | |
| cg27541604 | | AIM2;AIM2 | -0,28 | 1 | | 159046451 | 5'UTR;1stExon | |  | |
| cg18983132 | | MAGI2 | -0,28 | 7 | | 78024305 | Body | |  | |
| cg20385229 | | ALKBH1;C14orf156 | -0,28 | 14 | | 78175470 | TSS1500;Body | | S_Shore | |
| cg18704047 | | PART1;PART1;PDE4D;PART1 | -0,28 | 5 | | 59783668 | TSS200;Body;5'UTR;TSS200 | |  | |
| cg21713614 | | FRAS1;FRAS1 | -0,27 | 4 | | 79126719 | Body;Body | |  | |
| cg12524698 | | RPLP2 | -0,27 | 11 | | 808556 | TSS1500 | | N_Shore | |
| cg06796611 | | IL24;IL24;IL24;IL24 | -0,27 | 1 | | 207070834 | 1stExon;5'UTR;1stExon;5'UTR | |  | |
| cg14704968 | | APBB1IP | -0,27 | 10 | | 26730696 | 5'UTR | | S_Shelf | |
| cg06398251 | | EIF4G1;EIF4G1;EIF4G1;EIF4G1 | -0,27 | 3 | | 184033620 | Body;5'UTR;Body;5'UTR | | S_Shore | |
| cg10299383 | | RGS20;RGS20 | -0,27 | 8 | | 54798735 | Body;Body | | S_Shelf | |
| cg01862897 | | SLC8A3;SLC8A3;SLC8A3;SLC8A3;SLC8A3;SLC8A3 | -0,27 | 14 | | 70548168 | Body;Body;TSS1500;TSS1500;Body;Body | |  | |
| cg03507326 | | LOC100128788;SRRM2 | -0,27 | 16 | | 2801952 | Body;TSS1500 | | Island | |
| cg25808094 | | TBC1D4 | -0,27 | 13 | | 75892615 | Body | |  | |
| cg11767757 | | NCRNA00114 | -0,27 | 21 | | 40145404 | TSS200 | |  | |
| cg25769469 | | PTCD2 | -0,27 | 5 | | 71643841 | Body | |  | |
| cg14301348 | | LZTS1 | -0,27 | 8 | | 20109523 | Body | | S_Shore | |
| cg07616471 | | CCR5;CCR5 | -0,27 | 3 | | 46413711 | 5'UTR;5'UTR | |  | |
| cg19547141 | | MLL | -0,27 | 11 | | 118313315 | Body | |  | |
| cg20780180 | | SNX24 | -0,27 | 5 | | 122251808 | Body | |  | |
| cg05153380 | | ARHGAP26;ARHGAP26 | -0,27 | 5 | | 142163563 | Body;Body | |  | |
| cg14313576 | | KY | -0,27 | 3 | | 134339988 | Body | |  | |
| cg00063699 | | PTPN14 | -0,27 | 1 | | 214624242 | Body | |  | |
| cg05656688 | | RUNX3;RUNX3 | -0,27 | 1 | | 25254088 | Body;Body | | N_Shore | |
| cg23318703 | | CCDC146 | -0,27 | 7 | | 76895988 | Body | |  | |
| cg20287234 | | GPR55 | -0,27 | 2 | | 231789465 | 5'UTR | |  | |
| cg02673323 | | EEF1E1;SCARNA27;EEF1E1 | -0,27 | 6 | | 8087102 | Body;TSS1500;Body | |  | |
| cg09261289 | | KLRD1;KLRD1;KLRD1 | -0,27 | 12 | | 10459923 | TSS1500;5'UTR;TSS1500 | |  | |
| cg02234653 | | AP1S3 | -0,27 | 2 | | 224625080 | Body | |  | |
| cg05205932 | | PRKG2 | -0,27 | 4 | | 82086282 | Body | |  | |
| cg08554554 | | ARFRP1;ARFRP1 | -0,27 | 20 | | 62330618 | 3'UTR;3'UTR | | S_Shelf | |
| cg25636481 | | RPS18 | -0,27 | 6 | | 33241410 | Body | | S_Shore | |
| cg16469740 | | HDAC9;HDAC9 | -0,27 | 7 | | 19018055 | Body;Body | |  | |
| cg04388657 | | RPL35 | -0,27 | 9 | | 127623377 | Body | | N_Shore | |
| cg13320585 | | MIR1252;SYT1;SYT1;SYT1 | -0,27 | 12 | | 79812901 | TSS200;Body;Body;Body | |  | |
| cg05366160 | | HLA-DPA1 | -0,27 | 6 | | 33039481 | Body | |  | |
| cg19495351 | | UNC80;UNC80 | -0,27 | 2 | | 210675091 | Body;Body | | S_Shore | |
| cg19102955 | | TRMT6 | -0,27 | 20 | | 5928064 | Body | | N_Shelf | |
| cg09115713 | | FAM38A | -0,27 | 16 | | 88832476 | Body | |  | |
| cg26689186 | | BBS9;BBS9;BBS9;BBS9 | -0,27 | 7 | | 33301429 | Body;Body;Body;Body | |  | |
| cg15319470 | | FAM19A2 | -0,27 | 12 | | 62546183 | 5'UTR | |  | |
| cg21862081 | | POMT2 | -0,27 | 14 | | 77769687 | Body | |  | |
| cg14774290 | | PTK2;PTK2 | -0,27 | 8 | | 141934252 | 5'UTR;Body | |  | |
| cg22920603 | | ADNP;ADNP | -0,27 | 20 | | 49509062 | Body;Body | |  | |
| cg15500907 | | LAMA4;LAMA4;LAMA4 | -0,27 | 6 | | 112438951 | Body;Body;Body | |  | |
| cg11230435 | | MAP3K8 | -0,27 | 10 | | 30724374 | 5'UTR | | S_Shore | |
| cg22472360 | | TRIO | -0,27 | 5 | | 14414979 | Body | |  | |
| cg26913563 | | C5orf41;C5orf41;C5orf41 | -0,27 | 5 | | 172517927 | Body;Body;Body | |  | |
| cg06217769 | | SMG6;SMG6 | -0,27 | 17 | | 2126306 | Body;Body | |  | |
| cg07422329 | | PTGS2 | -0,27 | 1 | | 186642182 | 3'UTR | |  | |
| cg11249120 | | SAMD3;SAMD3 | -0,27 | 6 | | 130543838 | 5'UTR;1stExon | |  | |
| cg24028809 | | RGS17 | -0,27 | 6 | | 153414101 | 5'UTR | |  | |
| cg06644515 | | SNORD47;GAS5;SNORD81;SNORD80;SNORD78;SNORD79 | -0,27 | 1 | | 173834831 | TSS1500;Body;TSS1500;TSS1500;TSS200;TSS1500 | | N_Shelf | |
| cg06530558 | | UNC13C | -0,27 | 15 | | 54304778 | TSS1500 | |  | |
| cg10881225 | | TAF1B | -0,27 | 2 | | 9984929 | Body | | S_Shore | |
| cg01153946 | | LOC388796;SNORA71D;LOC388796 | -0,27 | 20 | | 37062621 | Body;Body;Body | | N_Shore | |
| cg15774510 | | FAS;FAS;FAS;FAS;FAS;FAS;FAS;ACTA2 | -0,27 | 10 | | 90749966 | TSS1500;TSS1500;TSS1500;TSS1500;TSS1500;TSS1500;TSS1500;5'UTR | | N_Shore | |
| cg01496720 | | KLF6;KLF6;KLF6;KLF6 | -0,27 | 10 | | 3825398 | Body;Body;Body;Body | | N_Shore | |
| cg07376029 | | GC | -0,27 | 4 | | 72650992 | TSS1500 | |  | |
| cg10660253 | | NANOG | -0,27 | 12 | | 7940546 | TSS1500 | |  | |
| cg14193653 | | NFIL3 | -0,27 | 9 | | 94178868 | 5'UTR | |  | |
| cg19010139 | | ULK4 | -0,27 | 3 | | 41695019 | Body | |  | |
| cg00759807 | | ANKRD11 | -0,27 | 16 | | 89390789 | 5'UTR | |  | |
| cg03478610 | | PPP2R3A | -0,27 | 3 | | 135702110 | 5'UTR | |  | |
| cg19113081 | | FAM55B | -0,27 | 11 | | 114548872 | TSS1500 | |  | |
| cg07512295 | | UGT1A6;UGT1A10;UGT1A9;UGT1A7;UGT1A8 | -0,27 | 2 | | 234599026 | TSS1500;Body;Body;Body;Body | |  | |
| cg19030682 | | SLC38A10 | -0,27 | 17 | | 79218991 | 3'UTR | |  | |
| cg10668121 | | ARHGAP25;ARHGAP25 | -0,27 | 2 | | 68968418 | Body;Body | |  | |
| cg15134506 | | USP54 | -0,27 | 10 | | 75336540 | TSS1500 | |  | |
| cg21429780 | | MAML3 | -0,27 | 4 | | 140779949 | Body | | N_Shore | |
| cg06708133 | | C19orf41 | -0,27 | 19 | | 50667801 | TSS1500 | | S_Shore | |
| cg26426690 | | CPEB3 | -0,27 | 10 | | 93861824 | Body | |  | |
| cg12629515 | | HIST1H3J;HIST1H2BO | -0,27 | 6 | | 27859811 | TSS1500;TSS1500 | | N_Shore | |
| cg04329478 | | LOC400696 | -0,27 | 19 | | 40169839 | TSS200 | |  | |
| cg12592365 | | RPTOR;RPTOR | -0,27 | 17 | | 78765948 | Body;Body | |  | |
| cg20676047 | | TSPAN4;TSPAN4;TSPAN4;TSPAN4;TSPAN4;TSPAN4;TSPAN4 | -0,27 | 11 | | 857071 | 5'UTR;Body;Body;Body;Body;Body;Body | | N_Shore | |
| cg20971407 | | BHLHE40 | -0,27 | 3 | | 5022392 | Body | | S_Shore | |
| cg18121713 | | VSNL1 | -0,27 | 2 | | 17738759 | 5'UTR | |  | |
| cg24806812 | | GC | -0,27 | 4 | | 72635202 | Body | |  | |
| cg14821245 | | CTNNA2;CTNNA2 | -0,27 | 2 | | 80253010 | Body;Body | |  | |
| cg01706991 | | BAALC;BAALC | -0,27 | 8 | | 104185501 | Body;Body | |  | |
| cg24298280 | | RNF217 | -0,27 | 6 | | 125305108 | 5'UTR | |  | |
| cg03337218 | | PRTFDC1 | -0,27 | 10 | | 25189866 | Body | |  | |
| cg22129183 | | FAM176A;FAM176A | -0,27 | 2 | | 75783509 | 5'UTR;5'UTR | | N_Shelf | |
| cg19588016 | | ASAP2;ASAP2 | -0,27 | 2 | | 9511523 | Body;Body | | N_Shelf | |
| cg11712187 | | KIF1B;KIF1B | -0,27 | 1 | | 10368286 | 3'UTR;Body | |  | |
| cg00934232 | | BAALC;BAALC | -0,27 | 8 | | 104185332 | Body;Body | |  | |
| cg21197224 | | SFRS1;SFRS1 | -0,27 | 17 | | 56082780 | 3'UTR;Body | | N_Shore | |
| cg00491064 | | NAV2 | -0,27 | 11 | | 19681786 | Body | |  | |
| cg13342710 | | MYLK;MYLK;MYLK;MYLK | -0,27 | 3 | | 123407570 | Body;Body;Body;Body | |  | |
| cg02810967 | | NCAPG;DCAF16 | -0,27 | 4 | | 17813558 | Body;TSS1500 | | S_Shore | |
| cg04929543 | | OSBPL6;OSBPL6 | -0,27 | 2 | | 179183500 | TSS1500;Body | |  | |
| cg12961607 | | SFRS7 | -0,27 | 2 | | 38976250 | Body | | N_Shore | |
| cg13064571 | | C8orf44 | -0,27 | 8 | | 67587053 | TSS1500 | |  | |
| cg24351076 | | ITPRIPL1;ITPRIPL1;ITPRIPL1;ITPRIPL1;ITPRIPL1;ITPRIPL1 | -0,27 | 2 | | 96992044 | Body;1stExon;5'UTR;5'UTR;5'UTR;1stExon | | S_Shore | |
| cg03444838 | | WDR37 | -0,27 | 10 | | 1156482 | Body | |  | |
| cg11929284 | | TMEM59L | -0,27 | 19 | | 18731797 | 3'UTR | |  | |
| cg16265932 | | RBM20 | -0,27 | 10 | | 112460964 | Body | |  | |
| cg03831847 | | FAM38A | -0,27 | 16 | | 88832485 | Body | |  | |
| cg12573871 | | ZNF407;ZNF407;ZNF407 | -0,27 | 18 | | 72509555 | Body;Body;Body | |  | |
| cg10960118 | | GAP43;GAP43 | -0,27 | 3 | | 115386082 | Body;Body | |  | |
| cg18700744 | | NAA25 | -0,27 | 12 | | 112534559 | Body | |  | |
| cg20799917 | | GALM | -0,27 | 2 | | 38894198 | Body | |  | |
| cg24487489 | | CUTA;CUTA;CUTA;CUTA;CUTA | -0,27 | 6 | | 33384337 | 3'UTR;3'UTR;3'UTR;3'UTR;3'UTR | | N_Shore | |
| cg23717593 | | COL24A1 | -0,27 | 1 | | 86617731 | Body | | N_Shelf | |
| cg02115781 | | METTL8 | -0,27 | 2 | | 172175273 | 3'UTR | |  | |
| cg08778216 | | RPL31;TBC1D8 | -0,27 | 2 | | 101628572 | Body;Body | |  | |
| cg11942059 | | COL9A1 | -0,27 | 6 | | 71014153 | TSS1500 | |  | |
| cg08614871 | | KLF6;KLF6;KLF6;KLF6 | -0,27 | 10 | | 3824555 | Body;Body;Body;Body | | S_Shore | |
| cg02734358 | | GPRIN3 | -0,27 | 4 | | 90227074 | 5'UTR | | N_Shore | |
| cg19376664 | | PBX2 | -0,27 | 6 | | 32153575 | 3'UTR | |  | |
| cg19640007 | | C4orf51 | -0,27 | 4 | | 146600771 | TSS1500 | |  | |
| cg06235438 | | ITGAL;ITGAL | -0,27 | 16 | | 30485966 | Body;Body | | S_Shore | |
| cg03401464 | | SNORD114-12 | -0,27 | 14 | | 101434601 | TSS1500 | |  | |
| cg08521995 | | ANK1;ANK1;ANK1;ANK1;ANK1 | -0,27 | 8 | | 41628237 | Body;Body;Body;Body;Body | | S_Shelf | |
| cg25281029 | | KITLG;KITLG | -0,27 | 12 | | 88969462 | Body;Body | | N_Shelf | |
| cg14585967 | | 01-dic | -0,27 | 9 | | 118135710 | 5'UTR | |  | |
| cg13445177 | | S100A10 | -0,27 | 1 | | 151967021 | TSS1500 | | S_Shore | |
| cg26128464 | | LCLAT1;LCLAT1 | -0,27 | 2 | | 30737741 | 5'UTR;Body | |  | |
| cg13879937 | | EHD4 | -0,27 | 15 | | 42265413 | TSS1500 | | S_Shore | |
| cg03965138 | | SIGLEC5 | -0,27 | 19 | | 52134393 | TSS1500 | |  | |
| cg16318311 | | NTN4 | -0,27 | 12 | | 96113161 | Body | |  | |
| cg10456591 | | NCOA2 | -0,27 | 8 | | 71279864 | 5'UTR | |  | |
| cg26795312 | | C8orf77 | -0,27 | 8 | | 146231199 | Body | | S_Shelf | |
| cg02059214 | | HHLA2 | -0,27 | 3 | | 108021106 | TSS1500 | |  | |
| cg20126656 | | USP36 | -0,27 | 17 | | 76801712 | Body | | S_Shelf | |
| cg09247619 | | PTPRC;PTPRC;PTPRC;PTPRC | -0,27 | 1 | | 198648849 | Body;Body;Body;Body | |  | |
| cg20516845 | | UBASH3A;UBASH3A | -0,27 | 21 | | 43823604 | TSS1500;TSS1500 | |  | |
| cg22277567 | | HDAC4 | -0,27 | 2 | | 240226201 | Body | |  | |
| cg22162757 | | PTPN14 | -0,27 | 1 | | 214699233 | 5'UTR | |  | |
| cg25392995 | | TRABD | -0,27 | 22 | | 50625926 | 5'UTR | | S_Shore | |
| cg26934362 | | LPCAT1 | -0,27 | 5 | | 1519265 | Body | | N_Shelf | |
| cg16838723 | | PDGFRA | -0,27 | 4 | | 55128515 | Body | |  | |
| cg13583414 | | LZTS1 | -0,27 | 8 | | 20109663 | Body | | S_Shelf | |
| cg00495811 | | LPCAT2 | -0,27 | 16 | | 55619692 | 3'UTR | |  | |
| cg01140247 | | C10orf11 | -0,27 | 10 | | 77784369 | Body | |  | |
| cg25955126 | | CRADD | -0,27 | 12 | | 94121046 | Body | |  | |
| cg26898567 | | TMEM220 | -0,26 | 17 | | 10630621 | Body | | N_Shelf | |
| cg26399994 | | PTPRC;PTPRC;PTPRC;PTPRC | -0,26 | 1 | | 198649046 | Body;Body;Body;Body | |  | |
| cg04716530 | | ITGAL;ITGAL | -0,26 | 16 | | 30485684 | Body;Body | | Island | |
| cg01331992 | | RPS6 | -0,26 | 9 | | 19379118 | Body | | N_Shore | |
| cg14790600 | | ATG5 | -0,26 | 6 | | 106634304 | 3'UTR | |  | |
| cg16175792 | | HSD3B1 | -0,26 | 1 | | 120050104 | Body | |  | |
| cg21193744 | | ANGPT2;ANGPT2;ANGPT2;MCPH1 | -0,26 | 8 | | 6405105 | Body;Body;Body;Body | |  | |
| cg00574196 | | LDLRAD2 | -0,26 | 1 | | 22137992 | TSS1500 | | N_Shelf | |
| cg07993586 | | DNAJB6 | -0,26 | 7 | | 157204960 | Body | | N_Shore | |
| cg04657000 | | FYN | -0,26 | 6 | | 112115430 | 5'UTR | |  | |
| cg15136410 | | STARD7 | -0,26 | 2 | | 96873066 | Body | | N_Shore | |
| cg00935717 | | ZMAT4;ZMAT4 | -0,26 | 8 | | 40432238 | Body;Body | |  | |
| cg09314495 | | CDK14 | -0,26 | 7 | | 90454617 | Body | |  | |
| cg26712743 | | PYROXD2 | -0,26 | 10 | | 100164594 | Body | |  | |
| cg07097184 | | FHDC1 | -0,26 | 4 | | 153900012 | 3'UTR | | S_Shelf | |
| cg13644626 | | PALM2;PALM2-AKAP2;PALM2;PALM2-AKAP2 | -0,26 | 9 | | 112545351 | Body;Body;Body;Body | | S_Shelf | |
| cg01959838 | | VAV3 | -0,26 | 1 | | 108292913 | Body | |  | |
| cg27254338 | | C17orf66 | -0,26 | 17 | | 34192710 | Body | |  | |
| cg13033858 | | SSH1;SSH1 | -0,26 | 12 | | 109248326 | Body;Body | | N_Shelf | |
| cg12476455 | | NASP;NASP;NASP | -0,26 | 1 | | 46052453 | Body;5'UTR;Body | | S_Shore | |
| cg02965895 | | OR51L1 | -0,26 | 11 | | 5020172 | TSS200 | |  | |
| cg03826247 | | PTPRG | -0,26 | 3 | | 61911607 | Body | |  | |
| cg14229655 | | FANCC | -0,26 | 9 | | 98052350 | 5'UTR | | N_Shelf | |
| cg06775361 | | SCOC | -0,26 | 4 | | 141188341 | 5'UTR | |  | |
| cg23732483 | | ARIH2 | -0,26 | 3 | | 48965611 | Body | |  | |
| cg17372806 | | RTN3;RTN3;RTN3;RTN3 | -0,26 | 11 | | 63448356 | TSS1500;TSS1500;TSS1500;TSS1500 | | N_Shore | |
| cg05280527 | | NRXN3;NRXN3;NRXN3 | -0,26 | 14 | | 80328450 | 3'UTR;3'UTR;3'UTR | | S_Shore | |
| cg16958351 | | SALL4 | -0,26 | 20 | | 50400640 | 3'UTR | |  | |
| cg14393693 | | PDE10A;PDE10A | -0,26 | 6 | | 166045279 | Body;5'UTR | |  | |
| cg02265239 | | DAAM1 | -0,26 | 14 | | 59748448 | Body | |  | |
| cg00864458 | | RPS20;RPS20 | -0,26 | 8 | | 56985462 | Body;3'UTR | | N_Shore | |
| cg24545949 | | PPP1R1C | -0,26 | 2 | | 182850114 | TSS1500 | |  | |
| cg24037746 | | C3orf30 | -0,26 | 3 | | 118868655 | Body | |  | |
| cg26638975 | | NKG7 | -0,26 | 19 | | 51876721 | TSS1500 | |  | |
| cg21581567 | | CREB5;CREB5;CREB5 | -0,26 | 7 | | 28502140 | 5'UTR;5'UTR;Body | |  | |
| cg13244293 | | NGLY1;OXSM;OXSM;OXSM | -0,26 | 3 | | 25832283 | TSS1500;Body;5'UTR;5'UTR | |  | |
| cg11235594 | | NPHP1;NPHP1;NPHP1;NPHP1 | -0,26 | 2 | | 110907413 | Body;Body;Body;Body | |  | |
| cg24054898 | | GYG1 | -0,26 | 3 | | 148721868 | Body | |  | |
| cg14091154 | | FRAS1;FRAS1 | -0,26 | 4 | | 79358764 | Body;Body | |  | |
| cg23651889 | | LPP;LPP;LPP | -0,26 | 3 | | 188115336 | 5'UTR;5'UTR;5'UTR | |  | |
| cg11173609 | | FMNL2 | -0,26 | 2 | | 153419601 | Body | |  | |
| cg01724456 | | FAM12B | -0,26 | 14 | | 21238436 | Body | |  | |
| cg16272981 | | LPCAT1 | -0,26 | 5 | | 1489889 | Body | | Island | |
| cg08522340 | | CTSC;CTSC;CTSC | -0,26 | 11 | | 88068493 | Body;Body;Body | | N_Shelf | |
| cg06951580 | | RASGEF1C | -0,26 | 5 | | 179591070 | 5'UTR | | S_Shelf | |
| cg25237894 | | C2orf82 | -0,26 | 2 | | 233734115 | TSS1500 | |  | |
| cg04381957 | | RFTN1 | -0,26 | 3 | | 16550461 | 5'UTR | | N_Shelf | |
| cg24278087 | | PACS1 | -0,26 | 11 | | 65904369 | Body | |  | |
| cg20995564 | | ZEB2;ZEB2 | -0,26 | 2 | | 145172035 | Body;Body | |  | |
| cg04641860 | | HNRNPF;HNRNPF;HNRNPF;HNRNPF;HNRNPF;HNRNPF | -0,26 | 10 | | 43891547 | 5'UTR;5'UTR;5'UTR;5'UTR;5'UTR;5'UTR | | Island | |
| cg26099432 | | RIMS1;RIMS1;RIMS1;RIMS1;RIMS1;RIMS1 | -0,26 | 6 | | 73103615 | Body;Body;Body;Body;Body;Body | |  | |
| cg05999010 | | ATXN7;ATXN7 | -0,26 | 3 | | 63881712 | 5'UTR;5'UTR | |  | |
| cg15880016 | | FLJ32810 | -0,26 | 11 | | 100661648 | Body | |  | |
| cg18433889 | | UGGT2 | -0,26 | 13 | | 96624108 | Body | |  | |
| cg11590705 | | ETNK1;ETNK1 | -0,26 | 12 | | 22781171 | Body;Body | | S_Shelf | |
| cg12646029 | | OR2H1 | -0,26 | 6 | | 29427451 | 5'UTR | |  | |
| cg06647068 | | CHST11 | -0,26 | 12 | | 104853274 | Body | | S_Shore | |
| cg06298205 | | FAM12A | -0,26 | 14 | | 21214078 | TSS200 | |  | |
| cg14276379 | | C9orf3 | -0,26 | 9 | | 97663142 | Body | |  | |
| cg20867746 | | OR51S1 | -0,26 | 11 | | 4871813 | TSS1500 | |  | |
| cg10805440 | | KRTAP27-1 | -0,26 | 21 | | 31710627 | TSS1500 | |  | |
| cg15028458 | | C3orf67 | -0,26 | 3 | | 58860290 | Body | |  | |
| cg03607415 | | GPR98;GPR98 | -0,26 | 5 | | 89881642 | Body;Body | |  | |
| cg03158561 | | RPL27A;SNORA45 | -0,26 | 11 | | 8705959 | Body;TSS1500 | | S_Shore | |
| cg04542977 | | EPS15 | -0,26 | 1 | | 51982669 | Body | | N_Shore | |
| cg19707677 | | C4BPB;C4BPB;C4BPB;C4BPB;C4BPB | -0,26 | 1 | | 207271346 | Body;Body;Body;Body;Body | |  | |
| cg09644952 | | CD86;CD86 | -0,26 | 3 | | 121796071 | TSS1500;Body | |  | |
| cg00936935 | | SGMS1 | -0,26 | 10 | | 52271899 | 5'UTR | |  | |
| cg22803223 | | C12orf66 | -0,26 | 12 | | 64587031 | 3'UTR | |  | |
| cg13676215 | | AHR | -0,26 | 7 | | 17337976 | TSS1500 | | N_Shore | |
| cg07271580 | | FAM198B;FAM198B;FAM198B | -0,26 | 4 | | 159095085 | TSS1500;TSS1500;TSS1500 | |  | |
| cg16340422 | | PLD6 | -0,26 | 17 | | 17110120 | TSS1500 | | Island | |
| cg23264429 | | STAMBPL1 | -0,26 | 10 | | 90642003 | 5'UTR | | S_Shore | |
| cg19834045 | | SCHIP1 | -0,26 | 3 | | 159507519 | Body | |  | |
| cg05942022 | | SLC2A1 | -0,26 | 1 | | 43402591 | Body | |  | |
| cg24517501 | | GFI1;GFI1 | -0,26 | 1 | | 92952702 | TSS1500;TSS1500 | | S_Shore | |
| cg11655410 | | MAGI2 | -0,26 | 7 | | 78870151 | Body | |  | |
| cg16035777 | | MFSD4 | -0,26 | 1 | | 205550148 | Body | |  | |
| cg25375916 | | SLC33A1 | -0,26 | 3 | | 155570275 | Body | | N_Shelf | |
| cg15740507 | | TBC1D23 | -0,26 | 3 | | 99988576 | Body | |  | |
| cg08752433 | | PPTC7 | -0,26 | 12 | | 111016566 | Body | | N_Shelf | |
| cg26869501 | | TMPO;TMPO;TMPO | -0,26 | 12 | | 98912949 | Body;Body;Body | | S_Shelf | |
| cg14475478 | | NEURL | -0,26 | 10 | | 105303766 | Body | |  | |
| cg00741695 | | LOC285768;LOC285768 | -0,26 | 6 | | 961559 | Body;Body | |  | |
| cg12011522 | | OSBPL6;OSBPL6 | -0,26 | 2 | | 179192421 | Body;Body | |  | |
| cg18362003 | | LOC399959 | -0,26 | 11 | | 122051630 | Body | |  | |
| cg25320328 | | GFI1;GFI1 | -0,26 | 1 | | 92953037 | TSS1500;TSS1500 | | S_Shore | |
| cg16345559 | | IKZF2;IKZF2 | -0,26 | 2 | | 213933386 | Body;Body | |  | |
| cg03228555 | | CEACAM19;CEACAM19;CEACAM19;CEACAM19 | -0,26 | 19 | | 45174912 | 5'UTR;5'UTR;1stExon;1stExon | |  | |
| cg12459932 | | RUNX3 | -0,26 | 1 | | 25292018 | TSS1500 | |  | |
| cg08623979 | | CSF3R;CSF3R;CSF3R;CSF3R | -0,26 | 1 | | 36936639 | Body;Body;Body;Body | |  | |
| cg13785196 | | TXLNA | -0,26 | 1 | | 32646858 | Body | | S_Shore | |
| cg11851382 | | PPAP2B;PPAP2B | -0,26 | 1 | | 56996910 | Body;Body | |  | |
| cg08882904 | | NACC1 | -0,26 | 19 | | 13233291 | 5'UTR | | S_Shelf | |
| cg09236445 | | PDZRN3 | -0,26 | 3 | | 73591147 | Body | |  | |
| cg23490246 | | HECW2 | -0,26 | 2 | | 197328556 | 5'UTR | |  | |
| cg00969893 | | TLN2 | -0,26 | 15 | | 63133069 | 3'UTR | |  | |
| cg07512814 | | LDLR | -0,26 | 19 | | 11203661 | Body | | S_Shore | |
| cg00362818 | | CLN5 | -0,26 | 13 | | 77565320 | TSS1500 | | N_Shore | |
| cg25455408 | | CEACAM6 | -0,26 | 19 | | 42274924 | 3'UTR | |  | |
| cg16618104 | | CHST11 | -0,26 | 12 | | 104853100 | Body | | S_Shore | |
| cg26251585 | | THSD7A | -0,26 | 7 | | 11456440 | Body | |  | |
| cg27618792 | | RPS12;SNORA33 | -0,26 | 6 | | 133138210 | Body;TSS200 | | S_Shelf | |
| cg16318728 | | PTPN14 | -0,26 | 1 | | 214679247 | 5'UTR | |  | |
| cg16341266 | | MIR548I4;CNTNAP2 | -0,26 | 7 | | 147256367 | TSS1500;Body | |  | |
| cg20063640 | | NOP56;NOP56;SNORA51 | -0,26 | 20 | | 2635105 | Body;Body;TSS1500 | | S_Shore | |
| cg08243465 | | PMEPA1;PMEPA1;PMEPA1;PMEPA1 | -0,26 | 20 | | 56274036 | 5'UTR;5'UTR;Body;Body | |  | |
| cg05963604 | | APPL1 | -0,26 | 3 | | 57263543 | Body | | S_Shore | |
| cg19195712 | | HCG22 | -0,26 | 6 | | 31026215 | Body | |  | |
| cg24082526 | | RPL13AP5;SNORD33;SNORD35A;SNORD34;RPL13A;SNORD32A | -0,26 | 19 | | 49993125 | Body;TSS1500;TSS1500;TSS1500;Body;TSS200 | | S_Shore | |
| cg16151924 | | CYP7B1 | -0,26 | 8 | | 65577290 | Body | |  | |
| cg01264963 | | OR10G4 | -0,26 | 11 | | 123885967 | TSS1500 | |  | |
| cg12833765 | | ANTXR1 | -0,26 | 2 | | 69470878 | Body | |  | |
| cg05293299 | | RBMS3;RBMS3;RBMS3 | -0,26 | 3 | | 29374128 | Body;Body;Body | |  | |
| cg00359365 | | MIR1976;RPS6KA1;RPS6KA1 | -0,26 | 1 | | 26880547 | TSS1500;Body;Body | |  | |
| cg19854901 | | RASSF1;RASSF1;RASSF1;RASSF1 | -0,26 | 3 | | 50376216 | TSS1500;TSS1500;Body;Body | | N_Shore | |
| cg08067983 | | ANKRD10 | -0,26 | 13 | | 111535587 | Body | |  | |
| cg09828381 | | PPM1H | -0,26 | 12 | | 63177404 | Body | |  | |
| cg01069738 | | RBP1 | -0,26 | 3 | | 139236278 | 3'UTR | |  | |
| cg03769939 | | RUNX3;RUNX3 | -0,26 | 1 | | 25254129 | Body;Body | | N_Shore | |
| cg01151584 | | EHD1 | -0,26 | 11 | | 64627528 | Body | |  | |
| cg15108958 | | MTRR;MTRR | -0,26 | 5 | | 7873542 | Body;Body | | S_Shelf | |
| cg20938802 | | GPR98;GPR98 | -0,26 | 5 | | 89858378 | Body;Body | | S_Shelf | |
| cg18119407 | | CFLAR;CFLAR | -0,26 | 2 | | 201980504 | TSS1500;TSS1500 | | N_Shore | |
| cg12024564 | | FAM19A2 | -0,26 | 12 | | 62546633 | 5'UTR | |  | |
| cg24872384 | | KRTAP4-3;KRTAP4-3 | -0,26 | 17 | | 39323742 | 3'UTR;1stExon | |  | |
| cg05279172 | | DLG4;DLG4 | -0,26 | 17 | | 7113697 | Body;Body | | N_Shelf | |
| cg00870449 | | SLC8A1;SLC8A1;SLC8A1;SLC8A1 | -0,26 | 2 | | 40508306 | Body;Body;Body;Body | |  | |
| cg15451980 | | RORA | -0,26 | 15 | | 60959637 | Body | |  | |
| cg00916659 | | TMEM206 | -0,26 | 1 | | 212558854 | Body | |  | |
| cg24630825 | | GPM6A;GPM6A | -0,26 | 4 | | 176909979 | 5'UTR;Body | |  | |
| cg09811510 | | SCHIP1 | -0,26 | 3 | | 159590447 | Body | |  | |
| cg17872838 | | UTP14C | -0,26 | 13 | | 52607339 | 3'UTR | |  | |
| cg11484872 | | TNF | -0,26 | 6 | | 31543169 | TSS200 | |  | |
| cg04945753 | | SPATS2L;SPATS2L;SPATS2L;SPATS2L | -0,26 | 2 | | 201320027 | Body;Body;Body;Body | |  | |
| cg04945608 | | TTPAL;TTPAL | -0,26 | 20 | | 43118723 | 3'UTR;3'UTR | |  | |
| cg07185587 | | AKAP6 | -0,26 | 14 | | 32981885 | Body | |  | |
| cg11069071 | | MIR496;MIR154 | -0,26 | 14 | | 101525465 | TSS1500;TSS1500 | |  | |
| cg14411221 | | WDR89;WDR89 | -0,26 | 14 | | 64064608 | 3'UTR;3'UTR | | S_Shelf | |
| cg19371121 | | TNN | -0,26 | 1 | | 175050479 | Body | | S_Shore | |
| cg08164233 | | RFXAP | -0,26 | 13 | | 37394589 | Body | | S_Shore | |
| cg18106582 | | SNX18;SNX18;SNX18;SNX18 | -0,26 | 5 | | 53816023 | 1stExon;Body;3'UTR;Body | | S_Shore | |
| cg05689413 | | MED20 | -0,26 | 6 | | 41885417 | Body | | N_Shelf | |
| cg16258657 | | RBMS3;RBMS3;RBMS3 | -0,26 | 3 | | 29338542 | Body;Body;Body | |  | |
| cg22274117 | | ATXN1;ATXN1 | -0,26 | 6 | | 16713613 | 5'UTR;5'UTR | |  | |
| cg15316716 | | DOK2 | -0,26 | 8 | | 21769797 | Body | | Island | |
| cg10636246 | | AIM2 | -0,26 | 1 | | 159046973 | TSS1500 | |  | |
| cg02778609 | | UBFD1;EARS2;EARS2 | -0,26 | 16 | | 23568302 | TSS1500;Body;Body | | N_Shore | |
| cg14627404 | | CD96;CD96 | -0,26 | 3 | | 111327958 | Body;Body | |  | |
| cg00033909 | | PER4 | -0,26 | 7 | | 9674902 | Body | |  | |
| cg16312870 | | TRIT1 | -0,26 | 1 | | 40343411 | Body | |  | |
| cg02732508 | | RPL13;RPL13 | -0,26 | 16 | | 89628853 | Body;Body | | S_Shore | |
| cg17830420 | | CADPS2;CADPS2;CADPS2 | -0,26 | 7 | | 122388911 | Body;Body;Body | |  | |
| cg09080874 | | DLG2;DLG2;DLG2;DLG2 | -0,26 | 11 | | 83284905 | Body;Body;Body;Body | |  | |
| cg02534850 | | HMGA2;HMGA2 | -0,26 | 12 | | 66228466 | Body;Body | |  | |
| cg09432154 | | MED12L;GPR87 | -0,26 | 3 | | 151034669 | Body;TSS200 | |  | |
| cg02358362 | | NEURL1B | -0,26 | 5 | | 172096266 | Body | | N_Shore | |
| cg25930962 | | FRMD5 | -0,26 | 15 | | 44321561 | Body | |  | |
| cg11484936 | | C3orf50 | -0,26 | 3 | | 168060761 | Body | |  | |
| cg00372249 | | ACSL1 | -0,25 | 4 | | 185745711 | 5'UTR | | N_Shore | |
| cg20939319 | | TEX15 | -0,25 | 8 | | 30707701 | TSS1500 | |  | |
| cg09775648 | | WDR75 | -0,25 | 2 | | 190309186 | Body | | S_Shelf | |
| cg19797700 | | RHOBTB1;RHOBTB1 | -0,25 | 10 | | 62723590 | Body;Body | |  | |
| cg06833431 | | PSMB8;PSMB8 | -0,25 | 6 | | 32810224 | Body;Body | | N_Shore | |
| cg09850101 | | RTN1;RTN1 | -0,25 | 14 | | 60195307 | Body;TSS1500 | | S_Shore | |
| cg22842189 | | THRB;THRB;THRB | -0,25 | 3 | | 24401786 | 5'UTR;5'UTR;5'UTR | |  | |
| cg25132536 | | EPN2;EPN2;EPN2 | -0,25 | 17 | | 19152434 | 5'UTR;5'UTR;5'UTR | |  | |
| cg14174912 | | KLF6;KLF6;KLF6;KLF6 | -0,25 | 10 | | 3824516 | Body;Body;Body;Body | | S_Shore | |
| cg16941122 | | UBAC2;UBAC2;UBAC2 | -0,25 | 13 | | 99965936 | Body;Body;Body | |  | |
| cg05928873 | | NEGR1 | -0,25 | 1 | | 72302970 | Body | |  | |
| cg07493097 | | UPP2;UPP2 | -0,25 | 2 | | 158957632 | TSS1500;Body | |  | |
| cg14421288 | | RPS29;RPS29 | -0,25 | 14 | | 50050946 | Body;Body | | N_Shore | |
| cg15892497 | | CD160 | -0,25 | 1 | | 145715719 | TSS200 | | S_Shore | |
| cg13590475 | | RPS12;SNORD100;SNORA33 | -0,25 | 6 | | 133137827 | Body;TSS200;TSS1500 | | S_Shore | |
| cg19412669 | | STK40 | -0,25 | 1 | | 36839270 | 5'UTR | |  | |
| cg03290281 | | C6orf195 | -0,25 | 6 | | 2632607 | 5'UTR | | N_Shore | |
| cg07837085 | | SLAMF7 | -0,25 | 1 | | 160708990 | TSS200 | |  | |
| cg15714682 | | LOC730755 | -0,25 | 17 | | 39217766 | TSS1500 | |  | |
| cg14537247 | | DENND1A;DENND1A | -0,25 | 9 | | 126656547 | Body;Body | |  | |
| cg07111834 | | PTPN22;PTPN22 | -0,25 | 1 | | 114402309 | Body;Body | |  | |
| cg15147833 | | OR1C1 | -0,25 | 1 | | 247921672 | 1stExon | |  | |
| cg16734875 | | GRHL3;GRHL3;GRHL3 | -0,25 | 1 | | 24678010 | Body;Body;Body | |  | |
| cg12311936 | | GTDC1;GTDC1;GTDC1;GTDC1 | -0,25 | 2 | | 144994885 | 5'UTR;5'UTR;5'UTR;1stExon | |  | |
| cg01245155 | | PARD3B;PARD3B;PARD3B | -0,25 | 2 | | 205919517 | Body;Body;Body | |  | |
| cg05644767 | | ITGAX | -0,25 | 16 | | 31366118 | TSS1500 | |  | |
| cg08119452 | | OLFM4 | -0,25 | 13 | | 53602385 | TSS1500 | |  | |
| cg04945379 | | CIITA | -0,25 | 16 | | 10970200 | TSS1500 | | N_Shelf | |
| cg10315334 | | CCL5;CCL5 | -0,25 | 17 | | 34207332 | 1stExon;5'UTR | |  | |
| cg27545630 | | SNORA64;SNORA10;RPS2 | -0,25 | 16 | | 2013058 | Body;TSS1500;Body | | N_Shore | |
| cg18781031 | | FBN2 | -0,25 | 5 | | 127598507 | Body | |  | |
| cg13615963 | | CCR6;CCR6;CCR6 | -0,25 | 6 | | 167536521 | 5'UTR;5'UTR;1stExon | |  | |
| cg21961694 | | SLC22A25 | -0,25 | 11 | | 62947565 | Body | |  | |
| cg10100437 | | CAPN2;CAPN2 | -0,25 | 1 | | 223903862 | Body;Body | | S_Shelf | |
| cg27270214 | | FLJ25758 | -0,25 | 19 | | 7007104 | TSS1500 | |  | |
| cg15693299 | | LOC360030 | -0,25 | 12 | | 7916371 | TSS1500 | |  | |
| cg12571570 | | ZEB2;ZEB2 | -0,25 | 2 | | 145267984 | Body;Body | |  | |
| cg01140143 | | HLA-DPA1 | -0,25 | 6 | | 33039396 | Body | |  | |
| cg19564512 | | NKG7 | -0,25 | 19 | | 51874939 | 3'UTR | | S_Shelf | |
| cg02127375 | | NBEA | -0,25 | 13 | | 35589003 | Body | |  | |
| cg09231418 | | ZBTB32 | -0,25 | 19 | | 36202390 | TSS1500 | |  | |
| cg13657200 | | DFNB31;DFNB31 | -0,25 | 9 | | 117266029 | Body;TSS1500 | | N_Shore | |
| cg07197831 | | DNAJC5G | -0,25 | 2 | | 27503157 | 3'UTR | |  | |
| cg11962007 | | RNF149 | -0,25 | 2 | | 101922922 | Body | | N_Shore | |
| cg11131599 | | PLEKHA6 | -0,25 | 1 | | 204224211 | Body | | N_Shelf | |
| cg06790044 | | KIAA1462 | -0,25 | 10 | | 30323377 | Body | |  | |
| cg13828440 | | KLRD1;KLRD1;KLRD1 | -0,25 | 12 | | 10459972 | TSS1500;5'UTR;TSS1500 | |  | |
| cg01953399 | | USP12 | -0,25 | 13 | | 27706214 | Body | |  | |
| cg00451397 | | GTF2A1L;GTF2A1L;STON1-GTF2A1L | -0,25 | 2 | | 48843645 | TSS1500;TSS1500;Body | | N_Shore | |
| cg08826743 | | DPYS | -0,25 | 8 | | 105392295 | 3'UTR | |  | |
| cg24855045 | | NSUN6 | -0,25 | 10 | | 18938449 | Body | | N_Shelf | |
| cg20959189 | | ZBTB38 | -0,25 | 3 | | 141122632 | 5'UTR | | S_Shore | |
| cg17602444 | | PRKAR1B;PRKAR1B;PRKAR1B;PRKAR1B;PRKAR1B;PRKAR1B | -0,25 | 7 | | 644819 | Body;Body;Body;Body;Body;Body | | N_Shore | |
| cg19293468 | | SMG6;SMG6 | -0,25 | 17 | | 1973400 | Body;Body | |  | |
| cg20822693 | | SLC16A14 | -0,25 | 2 | | 230934399 | TSS1500 | | S_Shore | |
| cg09971881 | | NRXN3;NRXN3;NRXN3 | -0,25 | 14 | | 79880024 | Body;Body;Body | |  | |
| cg21769093 | | VWC2 | -0,25 | 7 | | 49819689 | Body | | S_Shelf | |
| cg10453550 | | PRDM5 | -0,25 | 4 | | 121763322 | Body | |  | |
| cg00927226 | | TFEC;TFEC | -0,25 | 7 | | 115608801 | Body;Body | |  | |
| cg23581793 | | SNHG10;SCARNA13;SNHG10 | -0,25 | 14 | | 95999775 | Body;Body;Body | | N_Shore | |
| cg26165146 | | ARNTL2 | -0,25 | 12 | | 27484656 | TSS1500 | | N_Shore | |
| cg23878404 | | KRTAP1-5 | -0,25 | 17 | | 39183475 | TSS200 | |  | |
| cg12528835 | | RPS11;SNORD35B | -0,25 | 19 | | 50001058 | Body;Body | | S_Shore | |
| cg11271593 | | RPS11;SNORD35B | -0,25 | 19 | | 50000860 | Body;TSS200 | | S_Shore | |
| cg23642392 | | SLC2A9 | -0,25 | 4 | | 10042449 | TSS1500 | |  | |
| cg06738786 | | LOC100130264;SLC24A3 | -0,25 | 20 | | 19265058 | Body;Body | |  | |
| cg20167074 | | S100A10 | -0,25 | 1 | | 151967023 | TSS1500 | | S_Shore | |
| cg14743346 | | DERL1;DERL1 | -0,25 | 8 | | 124050185 | Body;Body | | N_Shelf | |
| cg00682487 | | DTHD1;DTHD1 | -0,25 | 4 | | 36283275 | 5'UTR;1stExon | |  | |
| cg18006637 | | FAM13A;FAM13A | -0,25 | 4 | | 89713820 | Body;Body | |  | |
| cg27319188 | | PACS1 | -0,25 | 11 | | 65880175 | Body | |  | |
| cg14366598 | | IL25;IL25 | -0,25 | 14 | | 23841754 | TSS1500;TSS1500 | |  | |
| cg12063992 | | PTPN9 | -0,25 | 15 | | 75865604 | Body | |  | |
| cg15920472 | | STK31;STK31;STK31 | -0,25 | 7 | | 23827492 | Body;Body;Body | |  | |
| cg03665078 | | TNFAIP8 | -0,25 | 5 | | 118689961 | Body | | N_Shore | |
| cg05174766 | | DLG2 | -0,25 | 11 | | 84880848 | Body | |  | |
| cg01737554 | | SLFN12L | -0,25 | 17 | | 33866071 | TSS1500 | |  | |
| cg14209244 | | SMC5 | -0,25 | 9 | | 72877684 | Body | | S_Shelf | |
| cg19190163 | | PSMB8;PSMB8 | -0,25 | 6 | | 32810785 | Body;Body | | N_Shore | |
| cg27321942 | | RPL13AP5;SNORD33;SNORD35A;SNORD34;RPL13A;SNORD32A | -0,25 | 19 | | 49993217 | Body;TSS1500;TSS1500;TSS1500;Body;TSS200 | | S_Shore | |
| cg23240171 | | PDE7B | -0,25 | 6 | | 136346628 | Body | |  | |
| cg19823847 | | KIAA1244;PBOV1 | -0,25 | 6 | | 138539706 | Body;TSS200 | |  | |
| cg03026004 | | ARHGAP28;ARHGAP28 | -0,25 | 18 | | 6833417 | TSS1500;TSS1500 | |  | |
| cg14005120 | | SYK;SYK;SYK;SYK | -0,25 | 9 | | 93652538 | Body;Body;Body;Body | |  | |
| cg07398791 | | TNFAIP8 | -0,25 | 5 | | 118676053 | Body | |  | |
| cg07023852 | | IVD;IVD | -0,25 | 15 | | 40696269 | TSS1500;TSS1500 | | N_Shore | |
| cg00670915 | | RPL31;RPL31;RPL31 | -0,25 | 2 | | 101620543 | Body;Body;Body | | S_Shore | |
| cg14514716 | | TANC1;TANC1 | -0,25 | 2 | | 159867130 | 5'UTR;5'UTR | |  | |
| cg16459265 | | C7orf40;SNORA9 | -0,25 | 7 | | 45025080 | Body;Body | | N_Shore | |
| cg20367077 | | CSRP3;CSRP3 | -0,25 | 11 | | 19224117 | TSS1500;TSS1500 | |  | |
| cg20665259 | | KCNH2;KCNH2 | -0,25 | 7 | | 150659402 | Body;Body | | S_Shelf | |
| cg27002303 | | LOC100188947 | -0,25 | 10 | | 93335196 | Body | |  | |
| cg06339171 | | PTPRG | -0,25 | 3 | | 61873593 | Body | |  | |
| cg01059398 | | TNFSF10 | -0,25 | 3 | | 172235808 | Body | |  | |
| cg18758433 | | RPTOR;RPTOR | 0,25 | 17 | | 78623601 | Body;Body | |  | |
| cg08992499 | | ATXN7;ATXN7 | 0,25 | 3 | | 63956514 | Body;Body | |  | |
| cg01832672 | | VPS37B | 0,25 | 12 | | 123358583 | Body | |  | |
| cg24375364 | | AMZ1 | 0,25 | 7 | | 2755000 | 3'UTR | | N_Shelf | |
| cg03215181 | | TRPC3 | 0,25 | 4 | | 122873487 | TSS1500 | | S_Shore | |
| cg03853208 | | MIR148A | 0,25 | 7 | | 25989763 | TSS200 | | N_Shore | |
| cg24703661 | | CD79A;CD79A;CD79A;CD79A | 0,25 | 19 | | 42381258 | 1stExon;5'UTR;1stExon;5'UTR | |  | |
| cg17344048 | | SPINT2;SPINT2 | 0,25 | 19 | | 38756382 | Body;Body | | S_Shore | |
| cg25354657 | | APLP2;APLP2;APLP2;APLP2;APLP2;APLP2 | 0,25 | 11 | | 129991445 | Body;Body;Body;Body;Body;Body | | N_Shelf | |
| cg06488150 | | DAGLB;DAGLB | 0,25 | 7 | | 6476003 | Body;Body | |  | |
| cg02512559 | | CFDP1 | 0,25 | 16 | | 75414554 | Body | |  | |
| cg27408285 | | CBX5;CBX5;CBX5;CBX5 | 0,25 | 12 | | 54653364 | 1stExon;TSS200;5'UTR;5'UTR | |  | |
| cg22136363 | | LSP1;LSP1;LSP1;LSP1 | 0,25 | 11 | | 1911511 | 3'UTR;3'UTR;3'UTR;3'UTR | |  | |
| cg13189271 | | JARID2 | 0,25 | 6 | | 15365693 | Body | |  | |
| cg25788549 | | AGAP3;AGAP3 | 0,25 | 7 | | 150786044 | Body;Body | | S_Shore | |
| cg10096215 | | DPEP2 | 0,25 | 16 | | 68034002 | TSS1500 | |  | |
| cg12014818 | | WNT10A | 0,25 | 2 | | 219744634 | TSS1500 | | N_Shore | |
| cg13665981 | | SPOCK2;SPOCK2 | 0,25 | 10 | | 73849167 | TSS1500;TSS1500 | | S_Shore | |
| cg18720486 | | SHQ1 | 0,25 | 3 | | 72870838 | Body | |  | |
| cg23970275 | | KLF7 | 0,25 | 2 | | 208008052 | Body | |  | |
| cg16836311 | | MAN1C1 | 0,25 | 1 | | 25944712 | 1stExon | | Island | |
| cg20208398 | | BLVRA | 0,25 | 7 | | 43804002 | 5'UTR | |  | |
| cg06151145 | | SLAIN2 | 0,25 | 4 | | 48346434 | Body | | S_Shelf | |
| cg13298859 | | LFNG | 0,25 | 7 | | 2551996 | TSS200 | |  | |
| cg08219170 | | GSTT1 | 0,25 | 22 | | 24384573 | TSS1500 | | S_Shore | |
| cg07330114 | | VGLL4;VGLL4;VGLL4 | 0,25 | 3 | | 11624023 | Body;TSS200;Body | |  | |
| cg09203501 | | WIPI2;WIPI2;WIPI2;WIPI2;WIPI2 | 0,25 | 7 | | 5271545 | 3'UTR;3'UTR;3'UTR;3'UTR;3'UTR | | S_Shelf | |
| cg27485596 | | ARHGEF7;ARHGEF7;ARHGEF7;ARHGEF7 | 0,26 | 13 | | 111829530 | Body;5'UTR;Body;Body | |  | |
| cg23357533 | | C13orf15 | 0,26 | 13 | | 42044673 | 3'UTR | |  | |
| cg11112161 | | SLFN12L | 0,26 | 17 | | 33823004 | Body | |  | |
| cg05429448 | | LOC152225 | 0,26 | 3 | | 101659630 | TSS200 | |  | |
| cg23824801 | | CBX5;CBX5;CBX5 | 0,26 | 12 | | 54653403 | TSS200;TSS200;5'UTR | |  | |
| cg23824902 | | SLC25A33 | 0,26 | 1 | | 9619882 | Body | |  | |
| cg26530485 | | LUZP1;LUZP1 | 0,26 | 1 | | 23496304 | TSS1500;TSS1500 | |  | |
| cg01768001 | | RCAN3 | 0,26 | 1 | | 24831147 | 5'UTR | | S_Shore | |
| cg04182483 | | RGS10;RGS10 | 0,26 | 10 | | 121259610 | 3'UTR;3'UTR | |  | |
| cg12700074 | | AKAP7;AKAP7;AKAP7 | 0,26 | 6 | | 131571435 | TSS200;TSS200;Body | |  | |
| cg16495448 | | CARD11 | 0,26 | 7 | | 3019260 | 5'UTR | |  | |
| cg08594681 | | CLU;CLU;CLU;CLU | 0,26 | 8 | | 27468684 | 1stExon;Body;Body;5'UTR | | N_Shelf | |
| cg01861509 | | SPOCK2;SPOCK2 | 0,26 | 10 | | 73849626 | TSS1500;TSS1500 | | S_Shore | |
| cg01682285 | | TSHR;TSHR;TSHR | 0,26 | 14 | | 81422160 | 1stExon;1stExon;1stExon | | S_Shore | |
| cg17176894 | | LRRC8C | 0,26 | 1 | | 90160031 | Body | |  | |
| cg03199014 | | ITPKB | 0,26 | 1 | | 226922948 | Body | | N_Shore | |
| cg00364026 | | HERC1 | 0,26 | 15 | | 64122626 | 5'UTR | | N_Shelf | |
| cg01557792 | | KIAA0247 | 0,26 | 14 | | 70162755 | Body | |  | |
| cg12949141 | | PCBD2 | 0,26 | 5 | | 134259545 | Body | |  | |
| cg19679865 | | RERE;RERE;RERE | 0,26 | 1 | | 8467904 | 5'UTR;Body;Body | |  | |
| cg25700533 | | DNAJC17;C15orf62 | 0,26 | 15 | | 41062088 | Body;TSS200 | |  | |
| cg24536818 | | KIAA0748;KIAA0748 | 0,26 | 12 | | 55371892 | 5'UTR;5'UTR | |  | |
| cg09572125 | | SYNGAP1 | 0,26 | 6 | | 33400477 | Body | |  | |
| cg00929860 | | SPOCK2;SPOCK2 | 0,26 | 10 | | 73846448 | 3'UTR;Body | | N_Shore | |
| cg24453118 | | LRCH1;LRCH1;LRCH1 | 0,26 | 13 | | 47229927 | Body;Body;Body | |  | |
| cg13710613 | | EHMT1;EHMT1 | 0,26 | 9 | | 140574551 | Body;Body | |  | |
| cg01946401 | | SUPT3H;SUPT3H;RUNX2;RUNX2;RUNX2;RUNX2 | 0,26 | 6 | | 45296101 | 5'UTR;Body;1stExon;5'UTR;5'UTR;1stExon | |  | |
| cg09127592 | | TRIM35 | 0,26 | 8 | | 27164804 | Body | | N_Shelf | |
| cg08639389 | | STIM2;STIM2;STIM2 | 0,26 | 4 | | 26995889 | Body;Body;Body | |  | |
| cg24729879 | | IL6ST;IL6ST | 0,27 | 5 | | 55288892 | 5'UTR;5'UTR | | N_Shore | |
| cg09086987 | | SATB1 | 0,27 | 3 | | 18470432 | 5'UTR | | S_Shelf | |
| cg14286456 | | RERE;RERE | 0,27 | 1 | | 8570225 | Body;Body | |  | |
| cg12467404 | | CD55;CD55 | 0,27 | 1 | | 207496045 | Body;Body | | S_Shore | |
| cg13724812 | | TGFBR2;TGFBR2 | 0,27 | 3 | | 30689835 | Body;Body | |  | |
| cg03611307 | | MIR1205;PVT1 | 0,27 | 8 | | 128972059 | TSS1500;Body | |  | |
| cg27300829 | | ITM2B | 0,27 | 13 | | 48811111 | Body | | S_Shelf | |
| cg18338046 | | TCF7;TCF7;TCF7;TCF7;TCF7;TCF7;TCF7 | 0,27 | 5 | | 133452188 | Body;Body;Body;Body;Body;Body;Body | | S_Shore | |
| cg04348305 | | PYGB | 0,27 | 20 | | 25230959 | Body | | S_Shore | |
| cg14688905 | | SLC11A2 | 0,27 | 12 | | 51403056 | Body | |  | |
| cg05460226 | | PIK3R5;PIK3R5 | 0,27 | 17 | | 8804279 | Body;Body | |  | |
| cg23676480 | | ACSS1 | 0,27 | 20 | | 25039812 | TSS200 | | S_Shore | |
| cg24243879 | | MYST4 | 0,27 | 10 | | 76614628 | Body | |  | |
| cg21977218 | | SFRS12;SFRS12 | 0,27 | 5 | | 65443428 | 5'UTR;Body | | S_Shelf | |
| cg27496339 | | BLVRA | 0,27 | 7 | | 43803803 | 5'UTR | |  | |
| cg03448915 | | TK2 | 0,28 | 16 | | 66583078 | Body | | N_Shore | |
| cg12221970 | | ITPKB | 0,28 | 1 | | 226884832 | Body | |  | |
| cg14020052 | | HDAC4 | 0,28 | 2 | | 240174659 | Body | |  | |
| cg02075820 | | NUCB2 | 0,28 | 11 | | 17300909 | 5'UTR | | S_Shelf | |
| cg17939889 | | HDAC4 | 0,28 | 2 | | 240174650 | Body | |  | |
| cg25011475 | | BMPR1A | 0,28 | 10 | | 88517608 | 5'UTR | | S_Shore | |
| cg23837109 | | PLAU;C10orf55;PLAU | 0,28 | 10 | | 75670435 | TSS1500;3'UTR;TSS1500 | | N_Shore | |
| cg18919209 | | MAML2 | 0,28 | 11 | | 96012039 | Body | |  | |
| cg06943912 | | SLC44A2 | 0,28 | 19 | | 10715612 | Body | | S_Shelf | |
| cg08360820 | | USP6NL | 0,28 | 10 | | 11652640 | 5'UTR | | N_Shore | |
| cg18483549 | | MYO1D | 0,28 | 17 | | 30842946 | Body | | N_Shelf | |
| cg07861448 | | MSC | 0,28 | 8 | | 72757787 | TSS1500 | | S_Shore | |
| cg24885723 | | CA6 | 0,28 | 1 | | 9030439 | Body | |  | |
| cg07381806 | | MOBKL2A | 0,28 | 19 | | 2094327 | 5'UTR | | N_Shore | |
| cg09747445 | | TLE3;TLE3;TLE3 | 0,28 | 15 | | 70387268 | Body;Body;Body | | N_Shore | |
| cg06360703 | | LASS6 | 0,28 | 2 | | 169482790 | Body | |  | |
| cg00644351 | | RGS10;RGS10 | 0,29 | 10 | | 121271840 | Body;Body | |  | |
| cg22945413 | | JAK1 | 0,29 | 1 | | 65399413 | 5'UTR | |  | |
| cg15694715 | | TMEM25;TMEM25;TMEM25;TMEM25;TMEM25;TMEM25 | 0,29 | 11 | | 118402280 | 5'UTR;5'UTR;5'UTR;5'UTR;5'UTR;5'UTR | | S_Shore | |
| cg17637327 | | GRAMD1B | 0,29 | 11 | | 123431162 | Body | |  | |
| cg12869659 | | ZNF238 | 0,29 | 1 | | 244213618 | TSS1500 | | Island | |
| cg12649038 | | ABLIM1;ABLIM1;ABLIM1;ABLIM1 | 0,29 | 10 | | 116282534 | Body;Body;5'UTR;Body | |  | |
| cg10555744 | | MAN1C1 | 0,29 | 1 | | 25946258 | Body | | S_Shore | |
| cg02387618 | | TCF7;TCF7;TCF7;TCF7;TCF7;TCF7;TCF7 | 0,29 | 5 | | 133453480 | Body;Body;Body;Body;Body;Body;Body | | S_Shelf | |
| cg03081675 | | IPCEF1;OPRM1;IPCEF1;IPCEF1 | 0,29 | 6 | | 154540097 | Body;Body;Body;Body | |  | |
| cg05095590 | | MAD1L1;MAD1L1;MAD1L1 | 0,29 | 7 | | 2139259 | Body;Body;Body | |  | |
| cg24180402 | | ACBD4;ACBD4;ACBD4;ACBD4 | 0,29 | 17 | | 43221464 | 3'UTR;3'UTR;3'UTR;3'UTR | | N_Shore | |
| cg10001987 | | ZBTB4;ZBTB4 | 0,29 | 17 | | 7381769 | 5'UTR;5'UTR | | N_Shore | |
| cg07784959 | | CXCR4;CXCR4 | 0,29 | 2 | | 136873409 | Body;1stExon | | N_Shore | |
| cg08313420 | | DAGLB;DAGLB | 0,29 | 7 | | 6476110 | Body;Body | |  | |
| cg21005240 | | KIAA0528 | 0,29 | 12 | | 22688743 | Body | |  | |
| cg03035849 | | BACH2;BACH2 | 0,30 | 6 | | 91003200 | 5'UTR;5'UTR | | N_Shore | |
| cg16201957 | | MAML3 | 0,30 | 4 | | 140992311 | Body | |  | |
| cg00744866 | | CLASP2 | 0,30 | 3 | | 33701209 | Body | |  | |
| cg02717454 | | CREBBP;CREBBP | 0,30 | 16 | | 3928799 | Body;Body | | N_Shore | |
| cg04635642 | | SNX29 | 0,30 | 16 | | 12183938 | Body | |  | |
| cg02322400 | | MAML2 | 0,31 | 11 | | 95980186 | Body | |  | |
| cg05590818 | | TLK1;TLK1 | 0,31 | 2 | | 171943243 | Body;Body | |  | |
| cg17962384 | | KCNIP2;KCNIP2;KCNIP2;KCNIP2;KCNIP2;KCNIP2 | 0,31 | 10 | | 103601188 | Body;Body;Body;Body;Body;Body | | N_Shore | |
| cg22589728 | | FOXP1;FOXP1 | 0,31 | 3 | | 71439885 | 5'UTR;5'UTR | |  | |
| cg08038033 | | FOXP1;FOXP1 | 0,31 | 3 | | 71354056 | 5'UTR;5'UTR | |  | |
| cg19851560 | | SMYD1 | 0,31 | 2 | | 88390167 | Body | |  | |
| cg08641990 | | SSBP3;SSBP3;SSBP3 | 0,31 | 1 | | 54822503 | Body;Body;Body | | S_Shore | |
| cg05512157 | | DIP2B | 0,32 | 12 | | 50901878 | Body | | S_Shelf | |
| cg19095568 | | DNAJC17;C15orf62 | 0,32 | 15 | | 41062113 | Body;TSS200 | |  | |
| cg07108579 | | SATB1;SATB1 | 0,32 | 3 | | 18391124 | Body;Body | |  | |
| cg07065759 | | ANKRD44 | 0,32 | 2 | | 198017462 | Body | |  | |
| cg06478504 | | HDAC4 | 0,33 | 2 | | 240174613 | Body | |  | |
| cg03204322 | | SAMD13;SAMD13;SAMD13 | 0,33 | 1 | | 84767878 | TSS1500;5'UTR;Body | | S_Shelf | |
| cg13172001 | | SMYD1 | 0,34 | 2 | | 88390175 | Body | |  | |
| cg00172603 | | SSBP3;SSBP3;SSBP3 | 0,38 | 1 | | 54822031 | Body;Body;Body | | Island | |

aTargetID: CpG Loci Identification, bUCSC_REFGENE_NAME: RefSeq gene name, cdelta (URE-control): absolute difference in beta values, dCHR: chromosome location, eMAPINFO: nucleotide position on the chromosome where this CpG is located, fUCSC_REFGENE_GROUP: CpG location relative to the gene, gRELATION TO UCSC CPG ISLAND: position of CpG relative to other CpGs within the gene.
