# Supplementary material for: CD137 (4-1BB) Costimulation Modifies DNA Methylation in CD8+ T Cell–Relevant Genes
Source: Oxford University Press journal article supplement (doi:10.1158/2326-6066.cir-17-0159), 2017-11-13
Supplement: 23266066cir170159-sup-181295_2_supp_4359480_vyj3d2.docx [file 23266066cir170159-sup-181295_2_supp_4359480_vyj3d2.docx]

**Supplementary Table S2: 6B4-related differentially methylated CpGs.**

| TargetIDa | UCSC_REFGENE_NAMEb | delta (6B4-control)c | CHRd | MAPINFOe | UCSC_REFGENE_GROUPf | RELATION TO UCSC CPG ISLANDg |
| --- | --- | --- | --- | --- | --- | --- |
| cg21036194 | SNCAIP | -0,7209917 | 5 | 121742044 | Body |  |
| cg25581222 | CSNK1G1 | -0,4064692 | 15 | 64539239 | Body |  |
| cg09948419 | MYO1G | -0,4029078 | 7 | 45019965 | TSS1500 |  |
| cg19067791 | TTC21B | -0,40058062 | 2 | 166809971 | Body | Island |
| cg07462448 | CASP7 | -0,3805849 | 10 | 115441840 | 5'UTR | S_Shore |
| cg22798362 | MYO1D | -0,365039 | 17 | 30850485 | Body | S_Shelf |
| cg00490406 | AIM2 | -0,3640878 | 1 | 159046773 | TSS200 |  |
| cg01751584 | LOC286359 | -0,3532129 | 9 | 100159780 | TSS1500 |  |
| cg12690978 | MFAP5 | -0,3522738 | 12 | 8801526 | Body |  |
| cg09800500 | BCAT1 | -0,3469892 | 12 | 24992256 | Body |  |
| cg15029037 | ZNF827 | -0,345196 | 4 | 146729164 | Body |  |
| cg06754496 | SGMS1 | -0,3441734 | 10 | 52268375 | 5'UTR |  |
| cg15521790 | MAML2 | -0,3430373 | 11 | 95889454 | Body |  |
| cg27023597 | MIR21 | -0,3404066 | 17 | 57918262 | TSS1500 |  |
| cg07826859 | MYO1G | -0,3392363 | 7 | 45020086 | TSS1500 |  |
| cg25808094 | TBC1D4 | -0,3388734 | 13 | 75892615 | Body |  |
| cg18028470 | PIGV | -0,3386751 | 1 | 27117061 | 5'UTR | S_Shelf |
| cg02532700 | NCF4 | -0,3367098 | 22 | 37257404 | Body |  |
| cg08656816 | CCL5 | -0,3321855 | 17 | 34207454 | TSS200 |  |
| cg23434815 | VCL | -0,3295825 | 10 | 75839302 | Body |  |
| cg14032089 | TMEM49;MIR21 | -0,329275 | 17 | 57917589 | 3'UTR;TSS1500 |  |
| cg01464186 | SGMS1 | -0,328876 | 10 | 52191661 | 5'UTR |  |
| cg05377120 | KLRD1 | -0,3247555 | 12 | 10456885 | TSS200 |  |
| cg25298754 | ZBED2;CD96 | -0,3222212 | 3 | 111314102 | 5'UTR;Body |  |
| cg02766539 | TMEM49 | -0,3214476 | 17 | 57861641 | Body |  |
| cg14627404 | CD96 | -0,3177547 | 3 | 111327958 | Body |  |
| cg12966876 | ACOXL | -0,3163612 | 2 | 111873850 | Body | N_Shore |
| cg04706229 | C14orf183 | -0,3114198 | 14 | 50550589 | Body |  |
| cg15636887 | ZPBP2 | -0,3090684 | 17 | 38023480 | TSS1500 | N_Shore |
| cg07211259 | PDCD1LG2 | -0,3075351 | 9 | 5510497 | TSS200 |  |
| cg14491535 | JAZF1 | -0,3060746 | 7 | 28195090 | Body |  |
| cg02512902 | KSR1 | -0,3059827 | 17 | 25799447 | 5'UTR |  |
| cg23679344 | MED1 | -0,3054613 | 17 | 37560925 | 3'UTR | S_Shore |
| cg00936790 | KIF13B | -0,30028229 | 8 | 29027844 | Body |  |
| cg23318703 | CCDC146 | -0,2966537 | 7 | 76895988 | Body |  |
| cg00803692 | CCR5 | -0,2946477 | 3 | 46411474 | TSS200 |  |
| cg26877720 | FAM107B | -0,2938162 | 10 | 14647530 | Body | S_Shore |
| cg02059214 | HHLA2 | -0,293146 | 3 | 108021106 | TSS1500 |  |
| cg00936935 | SGMS1 | -0,29065 | 10 | 52271899 | 5'UTR |  |
| cg02515217 | MIR21 | -0,2899947 | 17 | 57918600 | TSS200 |  |
| cg23202253 | ITPR2 | -0,2882779 | 12 | 26902211 | Body |  |
| cg14465207 | PDIA6 | -0,2840749 | 2 | 10951250 | Body | N_Shore |
| cg12706330 | GHITM | -0,2813996 | 10 | 85898700 | TSS1500 | N_Shore |
| cg08067983 | ANKRD10 | -0,278828 | 13 | 111535587 | Body |  |
| cg00640314 | SNORD87;SNHG6 | -0,2750387 | 8 | 67835853 | TSS1500;Body | N_Shore |
| cg07181702 | MIR21 | -0,2734725 | 17 | 57918682 | Body |  |
| cg17217296 | AIM2 | -0,2731521 | 1 | 159046937 | TSS1500 |  |
| cg16237031 | MAP3K7IP2 | -0,2725309 | 6 | 149657288 | 5'UTR |  |
| cg19811934 | SLC24A4 | -0,2723668 | 14 | 92927763 | Body |  |
| cg08919597 | TNFAIP3 | -0,2722417 | 6 | 138194824 | Body |  |
| cg25570522 | KIAA0922 | -0,2714926 | 4 | 154443833 | Body |  |
| cg26876834 | SNHG9;SNORA64;SNORA10;RPS2 | -0,2714166 | 16 | 2013573 | TSS1500;TSS1500;TSS1500;Body | N_Shore |
| cg10994564 | ADPRH | -0,270546 | 3 | 119306022 | Body |  |
| cg04276626 | MIR21 | -0,2699123 | 17 | 57918500 | TSS200 |  |
| cg03125341 | ZDHHC14 | -0,2684517 | 6 | 157882207 | Body |  |
| cg14585353 | ZPBP2 | -0,2681536 | 17 | 38023679 | TSS1500 | N_Shore |
| cg05696969 | SH3RF2 | -0,2673521 | 5 | 145326228 | Body |  |
| cg11065271 | SYTL3 | -0,2640376 | 6 | 159070607 | TSS1500 |  |
| cg22208022 | ATF7IP | -0,2637655 | 12 | 14553107 | 5'UTR |  |
| cg02544257 | FUK | -0,2634242 | 16 | 70510663 | Body | S_Shelf |
| cg05438378 | SMAD3 | -0,2626696 | 15 | 67383736 | Body |  |
| cg17143179 | PRDM1 | -0,2624478 | 6 | 106546824 | 5'UTR |  |
| cg02029843 | NEDD9 | -0,2624402 | 6 | 11278005 | Body |  |
| cg25320328 | GFI1 | -0,2618292 | 1 | 92953037 | TSS1500 | S_Shore |
| cg23684410 | SIK3 | -0,2608591 | 11 | 116897558 | Body |  |
| cg13359998 | GALNT2 | -0,2606587 | 1 | 230241764 | Body |  |
| cg04677410 | MAML2 | -0,2602837 | 11 | 95846117 | Body |  |
| cg23200218 | RYR1 | -0,2580063 | 19 | 39050485 | Body | N_Shore |
| cg17515347 | AIM2 | -0,2573409 | 1 | 159047163 | TSS1500 |  |
| cg10431989 | HHLA2 | -0,2573035 | 3 | 108021214 | TSS200 |  |
| cg13714407 | RAPGEF1 | -0,2565161 | 9 | 134604212 | Body |  |
| cg13064571 | C8orf44 | -0,2548707 | 8 | 67587053 | TSS1500 |  |
| cg06471491 | MIR21 | -0,2544927 | 17 | 57917974 | TSS1500 |  |
| cg13867370 | PIP5K1B | -0,2539135 | 9 | 71589563 | Body |  |
| cg06752040 | FAM107B | -0,2536933 | 10 | 14647373 | Body | S_Shore |
| cg18399451 | ATXN1 | -0,2528765 | 6 | 16421273 | 5'UTR |  |
| cg02782634 | TMEM49 | -0,2521449 | 17 | 57916643 | Body |  |
| cg07195224 | AIM2 | -0,2518797 | 1 | 159047034 | TSS1500 |  |
| cg16680125 | LGTN | -0,2514716 | 1 | 206782805 | Body | N_Shelf |
| cg18598146 | SNORD12B;C20orf199;MIR1259 | -0,2514454 | 20 | 47896448 | TSS1500;Body;TSS1500 | S_Shore |
| cg23828876 | PCYT1A | -0,2511174 | 3 | 196001706 | 5'UTR |  |
| cg05139728 | SBK1 | 0,250646 | 16 | 28306816 | 5'UTR | S_Shelf |
| cg19314352 | RARA | 0,2517175 | 17 | 38501397 | Body | Island |
| cg06927323 | TBX21 | 0,2573965 | 17 | 45809727 | TSS1500 | N_Shore |
| cg17939889 | HDAC4 | 0,2579629 | 2 | 240174650 | Body |  |
| cg05756780 | IL6R | 0,2586653 | 1 | 154380705 | Body | S_Shelf |
| cg23837109 | PLAU | 0,2588739 | 10 | 75670435 | TSS1500 | N_Shore |
| cg23953820 | DDR1 | 0,2675874 | 6 | 30851051 | TSS1500 | N_Shore |
| cg17117243 | SESN1 | 0,2677836 | 6 | 109341365 | Body |  |
| cg07065759 | ANKRD44 | 0,2685457 | 2 | 198017462 | Body |  |
| cg09098025 | CHMP7 | 0,2692138 | 8 | 23100643 | TSS1500 | N_Shelf |
| cg07377422 | RSPH6A | 0,2692944 | 19 | 46318633 | TSS200 | Island |
| cg14655843 | UGCG | 0,2741517 | 9 | 114688737 | Body |  |
| cg22453435 | FLJ13197;KLF3 | 0,2741669 | 4 | 38667430 | TSS1500;5'UTR | S_Shore |
| cg13298528 | CXCR5 | 0,2746841 | 11 | 118763863 | TSS1500 |  |
| cg10024583 | TBKBP1 | 0,2776337 | 17 | 45772800 | 1stExon | Island |
| cg19851560 | SMYD1 | 0,2828042 | 2 | 88390167 | Body |  |
| cg03772567 | USP24 | 0,2841145 | 1 | 55676815 | Body | N_Shelf |
| cg04116354 | MAN1C1 | 0,286707 | 1 | 26003643 | Body |  |
| cg02329430 | NPTN | 0,288303 | 15 | 73921385 | Body | N_Shelf |
| cg18338046 | TCF7 | 0,288533 | 5 | 133452188 | Body | S_Shore |
| cg04537602 | CXCR5 | 0,2885588 | 11 | 118763859 | TSS1500 |  |
| cg03708045 | KIAA0146 | 0,2893026 | 8 | 48595620 | Body |  |
| cg15459165 | LAPTM5 | 0,2920146 | 1 | 31223850 | Body |  |
| cg12726213 | WWP1 | 0,2924755 | 8 | 87368021 | 5'UTR |  |
| cg14020052 | HDAC4 | 0,2939076 | 2 | 240174659 | Body |  |
| cg01286930 | SPTBN1 | 0,2940799 | 2 | 54783773 | Body | N_Shore |
| cg19400179 | DZIP3 | 0,2953334 | 3 | 108321607 | 5'UTR |  |
| cg14982472 | ABCG1 | 0,2961615 | 21 | 43619651 | TSS200 |  |
| cg10799846 | SYNJ2 | 0,2999554 | 6 | 158406044 | Body | S_Shelf |
| cg02387618 | TCF7 | 0,3003979 | 5 | 133453480 | Body | S_Shelf |
| cg13789303 | FOXO3 | 0,3013477 | 6 | 108886681 | Body | S_Shelf |
| cg06478504 | HDAC4 | 0,3162243 | 2 | 240174613 | Body |  |
| cg01044293 | ITGA6 | 0,3250394 | 2 | 173296469 | Body | S_Shelf |
| cg01366941 | SNX29 | 0,3293174 | 16 | 12172962 | Body |  |
| cg17048073 | CHMP7 | 0,3298053 | 8 | 23102091 | 5'UTR | N_Shore |
| cg24786658 | GPR85 | 0,3517123 | 7 | 112727423 | TSS1500 |  |
| cg09804858 | TRERF1 | 0,4080949 | 6 | 42397121 | 5'UTR |  |

aTargetID: CpG Loci Identification, bUCSC_REFGENE_NAME: RefSeq gene name, cdelta (6B4-control): absolute difference in beta values,dCHR: chromosome location, eMAPINFO: nucleotide position on the chromosome where this CpG is located, fUCSC_REFGENE_GROUP: CpG location relative to the gene, gRELATION TO UCSC CPG ISLAND: position of CpG relative to other CpGs within the gene.
